# Supplementary material for: Allosteric control of Ubp6 and the proteasome via a bidirectional switch
Source: Nat Commun. 2022 Feb 11;13:838. doi: 10.1038/s41467-022-28186-y (PMC8837689; doi:10.1038/s41467-022-28186-y)
Supplement: Supplementary file 3 — Supplementary Data 1 [file 41467_2022_28186_MOESM3_ESM.xlsx]

## Sheet: Fig.1d_Suppl.Fig.5a
		Deuterium incorporation in Da for all peptides							timepoints shown in Figure 1D															Relative uptake difference in Da for all peptides							timepoints shown in Figure 1D				Relative uptake difference in Da for all peptides							timepoints shown in Figure 1D
						RP											RP+Ubp6-UbVMe											D(RP+Ubp6-UbVMe) - D(RP)											D(RP+Ubp6-UbVMe) - D(RP)
	Protein	Sequence	Start	End		10 sec	1 min	10 min	1 hour	4 hours			Sequence	Start	End		10 sec	1 min	10 min	1 hour	4 hours			Sequence	Start	End		10 sec	1 min	10 min	1 hour	4 hours			Sequence	Start	End		10 sec	1 min	10 min	1 hour	4 hours
	Rpt1	KSYGAAPYAAKL	38	49		3.43911	4.19341	4.46533	5.03414	5.44622			KSYGAAPYAAKL	38	49		3.45085	4.2205	4.28537	5.00701	5.51226			KSYGAAPYAAKL	38	49		0.0117	0.0271	-0.18	-0.0271	0.066			KSYGAAPYAAKL	38	49		0.0117	0.0271	-0.18	-0.0271	0.066
	Rpt1	KSYGAAPYAAKLKQTENDLKDIE	38	60		3.3559	4.24486	6.47331	9.12809	10.9375			KSYGAAPYAAKLKQTENDLKDIE	38	60		3.40079	4.4233	6.35661	8.91909	10.8516			KSYGAAPYAAKLKQTENDLKDIE	38	60		0.0449	0.1784	-0.1167	-0.209	-0.0859			KSYGAAPYAAKLKQTENDLKDIE	38	60		0.0449	0.1784	-0.1167	-0.209	-0.0859
	Rpt1	WDIMGDRQRLGEEHPLQ	82	98		1.82989	3.18011	5.33329	5.91763	5.78779			WDIMGDRQRLGEEHPLQ	82	98		1.91413	3.26598	4.95058	5.92868	5.7592			WDIMGDRQRLGEEHPLQ	82	98		0.0842	0.0859	-0.3827	0.0111	-0.0286			WDIMGDRQRLGEEHPLQ	82	98		0.0842	0.0859	-0.3827	0.0111	-0.0286
	Rpt1	WDIMGDRQRLGEEHPLQV	82	99		1.69684	3.24983	4.97528	5.48467	5.33934			WDIMGDRQRLGEEHPLQV	82	99		1.66608	2.96587	4.74482	5.53676	5.45092			WDIMGDRQRLGEEHPLQV	82	99		-0.0308	-0.284	-0.2305	0.0521	0.1116			WDIMGDRQRLGEEHPLQV	82	99		-0.0308	-0.284	-0.2305	0.0521	0.1116
	Rpt1	WDIMGDRQRLGEEHPLQVARC	82	102		2.1797	3.93537	6.49604	7.2069	7.15142			WDIMGDRQRLGEEHPLQVARC	82	102		1.99141	3.44851	5.85437	6.73742	7.02579			WDIMGDRQRLGEEHPLQVARC	82	102		-0.1883	-0.4869	-0.6417	-0.4695	-0.1256			WDIMGDRQRLGEEHPLQVARC	82	102		-0.1883	-0.4869	-0.6417	-0.4695	-0.1256
	Rpt1	VINLKQIAKF	146	155		2.48655	3.43414	4.83437	5.38959	5.39487			VINLKQIAKF	146	155		2.56046	3.7879	5.04987	5.47391	5.404			VINLKQIAKF	146	155		0.0739	0.3538	0.2155	0.0843	0.0091			VINLKQIAKF	146	155		0.0739	0.3538	0.2155	0.0843	0.0091
	Rpt1	VVGLGERVSPTD	156	167		2.52883	3.24887	4.47855	5.04104	5.29145			VVGLGERVSPTD	156	167		1.72357	2.3024	3.23908	3.87738	3.97017			VVGLGERVSPTD	156	167		-0.8053	-0.9465	-1.2395	-1.1637	-1.3213			VVGLGERVSPTD	156	167		-0.8053	-0.9465	-1.2395	-1.1637	-1.3213
	Rpt1	VVGLGERVSPTDIEE	156	170		2.85156	3.58203	4.68011	5.59656	6.17658			VVGLGERVSPTDIEE	156	170		1.88414	2.45186	3.63305	4.11747	4.33112			VVGLGERVSPTDIEE	156	170		-0.9674	-1.1302	-1.0471	-1.4791	-1.8455			VVGLGERVSPTDIEE	156	170		-0.9674	-1.1302	-1.0471	-1.4791	-1.8455
	Rpt1	IEEGMRVGVDRSKY	168	181		2.03122	3.04611	3.69458	4.12374	4.31783			IEEGMRVGVDRSKY	168	181		2.08383	2.93608	3.73297	4.2969	4.34071			IEEGMRVGVDRSKY	168	181		0.0526	-0.11	0.0384	0.1732	0.0229			IEEGMRVGVDRSKY	168	181		0.0526	-0.11	0.0384	0.1732	0.0229
	Rpt1	RSKYNIELPLPPRIDPSVTM	178	197		4.19654	4.62061	4.84437	5.38823	5.517			RSKYNIELPLPPRIDPSVTM	178	197		4.12436	4.49188	5.15769	5.47034	5.61913			RSKYNIELPLPPRIDPSVTM	178	197		-0.0722	-0.1287	0.3133	0.0821	0.1021			RSKYNIELPLPPRIDPSVTM	178	197		-0.0722	-0.1287	0.3133	0.0821	0.1021
	Rpt1	RSKYNIELPLPPRIDPSVTMM	178	198		4.47889	4.87912	5.4845	5.64382	5.84333			RSKYNIELPLPPRIDPSVTMM	178	198		4.29416	4.90486	5.54783	6.03637	6.04697			RSKYNIELPLPPRIDPSVTMM	178	198		-0.1847	0.0257	0.0633	0.3925	0.2036			RSKYNIELPLPPRIDPSVTMM	178	198		-0.1847	0.0257	0.0633	0.3925	0.2036
	Rpt1	NIELPLPPRIDPSVTM	182	197		3.7814	4.21159	4.45673	4.52262	4.45424			NIELPLPPRIDPSVTM	182	197		3.81737	4.16831	4.46324	4.49195	4.49416			NIELPLPPRIDPSVTM	182	197		0.036	-0.0433	0.0065	-0.0307	0.0399			NIELPLPPRIDPSVTM	182	197		0.036	-0.0433	0.0065	-0.0307	0.0399
	Rpt1	LPLPPRIDPSVTM	185	197		4.04616	4.32807	4.59003	4.7134	4.57594			LPLPPRIDPSVTM	185	197		n/a	n/a	n/a	n/a	n/a			MTVEEKPDVTYSDVGGCKDQIEKLRE	198	223		0.165	0.3594	0.3455	0.4661	0.3051			MTVEEKPDVTYSDVGGCKDQIEKLRE	198	223		0.165	0.3594	0.3455	0.4661	0.3051
	Rpt1	MTVEEKPDVTYSDVGGCKDQIEKLRE	198	223		6.4541	6.85152	8.37789	10.0969	10.9939			MTVEEKPDVTYSDVGGCKDQIEKLRE	198	223		6.61915	7.21096	8.72341	10.563	11.2991			TVEEKPDVTYSDVGGCKDQIEKLRE	199	223		0.0043	-0.0366	-0.1135	0.0504	0.2735			TVEEKPDVTYSDVGGCKDQIEKLRE	199	223		0.0043	-0.0366	-0.1135	0.0504	0.2735
	Rpt1	TVEEKPDVTYSDVGGCKDQIEKLRE	199	223		5.43117	5.7991	7.22261	9.35094	10.15			TVEEKPDVTYSDVGGCKDQIEKLRE	199	223		5.43543	5.76252	7.10907	9.40132	10.4235			REVVELPLLSPERF	222	235		-0.0531	-0.1339	0.046	0.0352	0.0317			REVVELPLLSPERF	222	235		-0.0531	-0.1339	0.046	0.0352	0.0317
	Rpt1	REVVELPLLSPERF	222	235		2.29571	3.13435	4.61464	5.10402	5.43979			REVVELPLLSPERF	222	235		2.24259	3.00044	4.66059	5.13924	5.47149			REVVELPLLSPERFATL	222	238		-0.171	-0.0784	-0.178	-0.0671	0.062			REVVELPLLSPERFATL	222	238		-0.171	-0.0784	-0.178	-0.0671	0.062
	Rpt1	REVVELPLLSPERFATL	222	238		3.81699	4.97009	6.78146	7.22586	7.48284			REVVELPLLSPERFATL	222	238		3.64594	4.89164	6.6035	7.15879	7.54485			VVELPLLSPERFATL	224	238		-0.0385	0.0072	-0.0597	0.0694	0.1611			VVELPLLSPERFATL	224	238		-0.0385	0.0072	-0.0597	0.0694	0.1611
	Rpt1	VVELPLLSPERFATL	224	238		3.33795	4.55535	6.11825	6.45812	6.5951			VVELPLLSPERFATL	224	238		3.29946	4.56254	6.05859	6.52748	6.75619			PLLSPERF	228	235		0.0586	-0.0002	0.0094	0.1497	0.1574			PLLSPERF	228	235		0.0586	-0.0002	0.0094	0.1497	0.1574
	Rpt1	LPLLSPERFATL	227	238		3.83631	4.94721	6.27802	6.4736	6.4258			LPLLSPERFATL	227	238		3.81326	4.72648	6.07218	6.50871	6.52793			LPLLSPERFATL	227	238		-0.023	-0.2207	-0.2058	0.0351	0.1021			LPLLSPERFATL	227	238		-0.023	-0.2207	-0.2058	0.0351	0.1021
	Rpt1	PLLSPERF	228	235		1.93145	2.49703	3.24431	3.34564	3.20001			PLLSPERF	228	235		1.99006	2.4968	3.25367	3.49537	3.35743			PLLSPERFATL	228	238		0.0219	-0.0144	-0.0402	0.0287	0.0043			PLLSPERFATL	228	238		0.0219	-0.0144	-0.0402	0.0287	0.0043
	Rpt1	PLLSPERFATL	228	238		3.64367	4.66239	5.50092	5.57947	5.6236			PLLSPERFATL	228	238		3.66557	4.64795	5.46076	5.60817	5.62792			GIDPPKGIL	239	247		-0.0151	0.0131	0.015	-0.0615	0.1649			GIDPPKGIL	239	247		-0.0151	0.0131	0.015	-0.0615	0.1649
	Rpt1	GIDPPKGIL	239	247		0.687583	0.970156	1.47315	1.84391	1.77338			GIDPPKGIL	239	247		0.672513	0.983273	1.48816	1.78243	1.93823			YGPPGTGKTLCA	249	260		0.3372	0.3264	0.0737	0.3591	0.0723			YGPPGTGKTLCA	249	260		0.3372	0.3264	0.0737	0.3591	0.0723
	Rpt1	GIDPPKGILL	239	248		0.552468	1.0817	1.33853	1.93356	2.1598			GIDPPKGILL	239	248		n/a	n/a	n/a	n/a	n/a			VQKYVGEGARM	280	290		0.1367	0.2984	0.1452	0.1274	0.1166			VQKYVGEGARM	280	290		0.1367	0.2984	0.1452	0.1274	0.1166
	Rpt1	YGPPGTGKTLCA	249	260		0.784786	1.36456	2.61119	2.99486	3.40721			YGPPGTGKTLCA	249	260		1.12201	1.69094	2.68488	3.35397	3.47947			MARTKKACIIF	297	307		-0.2133	-0.1803	-0.0922	0.1441	-0.0261			MARTKKACIIF	297	307		-0.2133	-0.1803	-0.0922	0.1441	-0.0261
	Rpt1	VQKYVGEGARM	280	290		3.12466	4.13133	5.24191	5.72976	5.58029			VQKYVGEGARM	280	290		3.26132	4.42976	5.38708	5.85716	5.69684			FDEIDAVGGARF	308	319		0.074	0.1889	0.1674	0.1217	0.2382			FDEIDAVGGARF	308	319		0.074	0.1889	0.1674	0.1217	0.2382
	Rpt1	MARTKKACIIF	297	307		1.58586	2.03105	2.25549	2.2164	2.27666			MARTKKACIIF	297	307		1.37259	1.85071	2.16327	2.36049	2.25054			AVGGARFDDGAGGDN	313	327		0.068	-0.4689	-0.42	-0.2189	-0.023			AVGGARFDDGAGGDN	313	327		0.068	-0.4689	-0.42	-0.2189	-0.023
	Rpt1	FDEIDAVGGARF	308	319		3.49266	4.15078	5.07253	5.63918	5.9104			FDEIDAVGGARF	308	319		3.56666	4.33967	5.23993	5.76089	6.14864			AVGGARFDDGAGGDNEVQRTML	313	334		-0.0482	-0.225	0.0522	-0.1712	0.1498			AVGGARFDDGAGGDNEVQRTML	313	334		-0.0482	-0.225	0.0522	-0.1712	0.1498
	Rpt1	AVGGARFDDGAGGDN	313	327		5.49625	5.93082	6.00347	6.34152	6.06108			AVGGARFDDGAGGDN	313	327		5.56424	5.46196	5.58345	6.12266	6.03812			AVGGARFDDGAGGDNEVQRTMLEL	313	336		-0.2914	-0.2695	0.1293	0.1012	0.1509			AVGGARFDDGAGGDNEVQRTMLEL	313	336		-0.2914	-0.2695	0.1293	0.1012	0.1509
	Rpt1	AVGGARFDDGAGGDNEVQRTML	313	334		6.29551	7.53791	8.63536	9.5783	9.62748			AVGGARFDDGAGGDNEVQRTML	313	334		6.2473	7.31295	8.68759	9.40709	9.77732			DDGAGGDNEVQRTML	320	334		-0.0732	-0.0363	-0.0767	0.2687	0.0775			DDGAGGDNEVQRTML	320	334		-0.0732	-0.0363	-0.0767	0.2687	0.0775
	Rpt1	AVGGARFDDGAGGDNEVQRTMLEL	313	336		5.13844	6.49276	8.58989	9.74111	10.2739			AVGGARFDDGAGGDNEVQRTMLEL	313	336		4.84704	6.22324	8.71914	9.84236	10.4248			LITQLDGFDPRGNIKVMF	336	353		0.0314	0.1488		0.0248				LITQLDGFDPRGNIKVMF	336	353		0.0314	0.1488	0	0.0248	0
	Rpt1	DDGAGGDNEVQRTML	320	334		3.78095	4.70192	5.90675	6.45474	6.69981			DDGAGGDNEVQRTML	320	334		3.70772	4.66562	5.83002	6.72347	6.77726			ITQLDGFDPRGNIKVMF	337	353		-0.0482	-0.0913	-0.1495	0.0023	0.1422			ITQLDGFDPRGNIKVMF	337	353		-0.0482	-0.0913	-0.1495	0.0023	0.1422
	Rpt1	LITQLDGFDPRGNIKVMF	336	353		2.7996	3.61568	4.17324	4.95659	5.94658			LITQLDGFDPRGNIKVMF	336	353		2.83103	3.76449	n/a	4.98138	n/a			DGFDPRGNIKVMF	341	353		0.1068	-0.0949	0.0025	0.0734	0.0481			DGFDPRGNIKVMF	341	353		0.1068	-0.0949	0.0025	0.0734	0.0481
	Rpt1	ITQLDGFDPRGNIKVMF	337	353		2.804	3.7206	4.43197	4.99967	5.53547			ITQLDGFDPRGNIKVMF	337	353		2.75584	3.62926	4.28251	5.002	5.67768			ATNRPNTLDPAL	354	365		0.1126	0.0747	0.0528	0.1933	0.2814			ATNRPNTLDPAL	354	365		0.1126	0.0747	0.0528	0.1933	0.2814
	Rpt1	DGFDPRGNIKVMF	341	353		2.12528	2.84141	3.24675	3.73265	4.05272			DGFDPRGNIKVMF	341	353		2.23211	2.74649	3.24923	3.80609	4.10085			LRPGRIDRKVEFSLPDLEGRANI	366	388		0.202	0.0804	0.0739	-0.0198	-0.0474			LRPGRIDRKVEFSLPDLEGRANI	366	388		0.202	0.0804	0.0739	-0.0198	-0.0474
	Rpt1	ATNRPNTLDPAL	354	365		1.82042	2.46664	3.19601	3.44374	3.42987			ATNRPNTLDPAL	354	365		1.93304	2.5413	3.24883	3.63704	3.71128			ISRLCPNSTGAE	407	418		0.1832	0.1337	-0.1076	-0.1119	0.0664			ISRLCPNSTGAE	407	418		0.1832	0.1337	-0.1076	-0.1119	0.0664
	Rpt1	LRPGRIDRKVEFSLPDLEGRANI	366	388		4.16113	5.4321	6.57552	7.63252	8.55557			LRPGRIDRKVEFSLPDLEGRANI	366	388		4.36311	5.51252	6.64939	7.61267	8.50822			ISRLCPNSTGAEL	407	419		0.0422	0.336	0.0948	-0.0314	0.1597			ISRLCPNSTGAEL	407	419		0.0422	0.336	0.0948	-0.0314	0.1597
	Rpt1	ISRLCPNSTGAE	407	418		1.21296	1.55691	2.6624	3.8773	4.53984			ISRLCPNSTGAE	407	418		1.3962	1.69064	2.55476	3.76536	4.60621			RSVCTEAGM	420	428		-0.0488	-0.1242	0.0604	-0.1239	-0.058			RSVCTEAGM	420	428		-0.0488	-0.1242	0.0604	-0.1239	-0.058
	Rpt1	ISRLCPNSTGAEL	407	419		0.983708	1.11021	2.30765	3.31526	3.94029			ISRLCPNSTGAEL	407	419		1.02593	1.44624	2.40241	3.28382	4.10001			FLKAVDKVISGYKKFSSTSRY	443	463		-0.0187	-0.0367	-0.2981	-0.1704	-0.0558			FLKAVDKVISGYKKFSSTSRY	443	463		-0.0187	-0.0367	-0.2981	-0.1704	-0.0558
	Rpt1	RSVCTEAGM	420	428		0.522191	0.593235	0.525627	0.679196	0.962956			RSVCTEAGM	420	428		0.473342	0.469014	0.585999	0.555333	0.90491			VDKVISGYKKFSSTSRY	447	463		0.1129	-0.0124	0.0518	0.0314	-0.4928			VDKVISGYKKFSSTSRY	447	463		0.1129	-0.0124	0.0518	0.0314	-0.4928
	Rpt1	FLKAVDKVISGYKKFSSTSRY	443	463		7.66085	7.79196	8.84203	9.75266	10.2116			FLKAVDKVISGYKKFSSTSRY	443	463		7.64212	7.75528	8.54388	9.58227	10.1559			VDKVISGYKKFSSTSRYMQYN	447	467		0.5989	0.0877	-0.2493	0.2412	-0.2615			VDKVISGYKKFSSTSRYMQYN	447	467		0.5989	0.0877	-0.2493	0.2412	-0.2615
	Rpt1	VDKVISGYKKFSSTSRY	447	463		6.43689	6.65846	7.04407	7.62764	8.06066			VDKVISGYKKFSSTSRY	447	463		6.54983	6.64606	7.0959	7.65907	7.56789			YKKFSSTSRY	454	463			-0.0938	0.0778	0.1451	0.179			YKKFSSTSRY	454	463		0	-0.0938	0.0778	0.1451	0.179
	Rpt1	VDKVISGYKKFSSTSRYMQYN	447	467		8.36117	8.95837	9.52849	10.1761	10.1647			VDKVISGYKKFSSTSRYMQYN	447	467		8.96002	9.04612	9.27915	10.4173	9.90314			YKKFSSTSRYMQYN	454	467		0.0674	-0.0712	-0.0807	0.045	-0.1444			YKKFSSTSRYMQYN	454	467		0.0674	-0.0712	-0.0807	0.045	-0.1444
	Rpt1	YKKFSSTSRY	454	463		n/a	3.93837	3.73863	4.0282	3.78782			YKKFSSTSRY	454	463		3.8762	3.84456	3.81641	4.17329	3.96683
	Rpt1	YKKFSSTSRYMQYN	454	467		5.51419	5.51834	5.59742	5.73933	5.42225			YKKFSSTSRYMQYN	454	467		5.58164	5.44718	5.51676	5.78436	5.27789
	Protein	Sequence	Start	End		10 sec	1 min	10 min	1 hour	4 hours			Sequence	Start	End		10 sec	1 min	10 min	1 hour	4 hours
	Rpt2	LRMERIKDHLLL	60	71		0.193447	0.215285	0.277611	0.249595	0.190254			LRMERIKDHLLL	60	71		0.262113	0.295158	0.312251	0.248334	0.321952			LRMERIKDHLLL	60	71		0.0687	0.0799	0.0346	-0.0013	0.1317			LRMERIKDHLLL	60	71		0.0687	0.0799	0.0346	-0.0013	0.1317
	Rpt2	ERIKDHLLL	63	71		0.201761	0.103728	0.128676	0.123594	0.123022			ERIKDHLLL	63	71		0.197764	0.110219	0.102754	0.172544	0.145642			ERIKDHLLL	63	71		-0.004	0.0065	-0.0259	0.0489	0.0226			ERIKDHLLL	63	71		-0.004	0.0065	-0.0259	0.0489	0.0226
	Rpt2	FVSNSEILKPFEKKQEEEKKQLEEIRGNPLSIGTL	75	109		9.44873	12.131	14.9071	16.1368	17.2842			FVSNSEILKPFEKKQEEEKKQLEEIRGNPLSIGTL	75	109		9.93653	12.3776	14.6784	16.4909	17.5313			FVSNSEILKPFEKKQEEEKKQLEEIRGNPLSIGTL	75	109		0.4878	0.2467	-0.2287	0.3541	0.2471			FVSNSEILKPFEKKQEEEKKQLEEIRGNPLSIGTL	75	109		0.4878	0.2467	-0.2287	0.3541	0.2471
	Rpt2	ILKPFEKKQEEEKKQLEEIRGNPLSIGTL	81	109		8.0751	10.169	11.916	12.7988	13.9473			ILKPFEKKQEEEKKQLEEIRGNPLSIGTL	81	109		8.54279	10.3189	11.8992	13.2806	13.9203			ILKPFEKKQEEEKKQLEEIRGNPLSIGTL	81	109		0.4677	0.1499	-0.0168	0.4818	-0.027			ILKPFEKKQEEEKKQLEEIRGNPLSIGTL	81	109		0.4677	0.1499	-0.0168	0.4818	-0.027
	Rpt2	IRGNPLSIGTL	99	109		0.693077	0.793301	0.943065	1.40723	2.00768			IRGNPLSIGTL	99	109		0.725471	0.739257	1.03717	1.61668	2.29396			IRGNPLSIGTL	99	109		0.0324	-0.054	0.0941	0.2094	0.2863			IRGNPLSIGTL	99	109		0.0324	-0.054	0.0941	0.2094	0.2863
	Rpt2	EEIIDDDHA	110	118		0.766697	1.07145	1.16114	1.21912	1.377			EEIIDDDHA	110	118		0.811614	1.03863	1.20588	1.16295	1.31733			EEIIDDDHA	110	118		0.0449	-0.0328	0.0447	-0.0562	-0.0597			EEIIDDDHA	110	118		0.0449	-0.0328	0.0447	-0.0562	-0.0597
	Rpt2	EEIIDDDHAIVTSPTMPDY	110	128		1.85697	2.57375	2.97109	3.35592	3.61653			EEIIDDDHAIVTSPTMPDY	110	128		1.89653	2.62702	2.93305	3.32982	3.60524			EEIIDDDHAIVTSPTMPDY	110	128		0.0396	0.0533	-0.038	-0.0261	-0.0113			EEIIDDDHAIVTSPTMPDY	110	128		0.0396	0.0533	-0.038	-0.0261	-0.0113
	Rpt2	IIDDDHAIVTSPTMPDY	112	128		1.70772	2.17706	2.57925	2.92511	3.01717			IIDDDHAIVTSPTMPDY	112	128		1.7179	2.23868	2.37003	2.86326	3.01553			IIDDDHAIVTSPTMPDY	112	128		0.0102	0.0616	-0.2092	-0.0619	-0.0016			IIDDDHAIVTSPTMPDY	112	128		0.0102	0.0616	-0.2092	-0.0619	-0.0016
	Rpt2	YVSILSF	129	135		0.157367	0.158279	0.337543	0.850179	1.24451			YVSILSF	129	135		0.148343	0.112058	0.353737	0.797643	1.19242			YVSILSF	129	135		-0.009	-0.0462	0.0162	-0.0525	-0.0521			YVSILSF	129	135		-0.009	-0.0462	0.0162	-0.0525	-0.0521
	Rpt2	SFVDKELLEPGCS	134	146		0.823094	1.42688	2.60537	3.63933	4.38572			SFVDKELLEPGCS	134	146		0.832681	1.46229	2.51255	3.40263	4.52872			SFVDKELLEPGCS	134	146		0.0096	0.0354	-0.0928	-0.2367	0.143			SFVDKELLEPGCS	134	146		0.0096	0.0354	-0.0928	-0.2367	0.143
	Rpt2	SFVDKELLEPGCSVL	134	148		0.724749	1.41191	2.55275	3.89324	4.36496			SFVDKELLEPGCSVL	134	148		0.684999	1.20219	2.36881	3.45983	4.07961			SFVDKELLEPGCSVL	134	148		-0.0398	-0.2097	-0.1839	-0.4334	-0.2854			SFVDKELLEPGCSVL	134	148		-0.0398	-0.2097	-0.1839	-0.4334	-0.2854
	Rpt2	VDKELLEPGCS	136	146		0.694419	1.34002	2.36345	3.33786	4.26462			VDKELLEPGCS	136	146		0.675409	1.51606	2.33187	3.33682	4.39317			VDKELLEPGCS	136	146		-0.019	0.176	-0.0316	-0.001	0.1286			VDKELLEPGCS	136	146		-0.019	0.176	-0.0316	-0.001	0.1286
	Rpt2	VLLHHKTMSIVGVLQD	147	162		1.40659	1.5746	1.9161	3.03016	3.41493			VLLHHKTMSIVGVLQD	147	162		1.488	1.60498	1.97006	2.94335	3.64177			VLLHHKTMSIVGVLQD	147	162		0.0814	0.0304	0.054	-0.0868	0.2268			VLLHHKTMSIVGVLQD	147	162		0.0814	0.0304	0.054	-0.0868	0.2268
	Rpt2	VLLHHKTMSIVGVLQDDADPMVS	147	169		4.83515	5.13405	5.67256	6.59897	6.923			VLLHHKTMSIVGVLQDDADPMVS	147	169		4.86318	5.03634	5.36142	6.33374	6.9657			VLLHHKTMSIVGVLQDDADPMVS	147	169		0.028	-0.0977	-0.3111	-0.2652	0.0427			VLLHHKTMSIVGVLQDDADPMVS	147	169		0.028	-0.0977	-0.3111	-0.2652	0.0427
	Rpt2	VLLHHKTMSIVGVLQDDADPMVSVM	147	171		6.25937	6.41229	6.78502	8.37234	8.16817			VLLHHKTMSIVGVLQDDADPMVSVM	147	171		5.89099	6.23836	6.66885	7.76354	8.34854			VLLHHKTMSIVGVLQDDADPMVSVM	147	171		-0.3684	-0.1739	-0.1162	-0.6088	0.1804			VLLHHKTMSIVGVLQDDADPMVSVM	147	171		-0.3684	-0.1739	-0.1162	-0.6088	0.1804
	Rpt2	VMKMDKSPTESYSDIGGLESQ	170	190		6.47864	7.252	8.18791	9.32124	9.34501			VMKMDKSPTESYSDIGGLESQ	170	190		6.1331	6.71534	8.10457	8.8617	9.22372			VMKMDKSPTESYSDIGGLESQ	170	190		-0.3455	-0.5367	-0.0833	-0.4595	-0.1213			VMKMDKSPTESYSDIGGLESQ	170	190		-0.3455	-0.5367	-0.0833	-0.4595	-0.1213
	Rpt2	MKMDKSPTESYSDIGGLESQ	171	190		5.89986	6.45248	7.67047	8.44776	8.67554			MKMDKSPTESYSDIGGLESQ	171	190		5.73581	6.34807	7.32157	8.47414	8.48595			MKMDKSPTESYSDIGGLESQ	171	190		-0.164	-0.1044	-0.3489	0.0264	-0.1896			MKMDKSPTESYSDIGGLESQ	171	190		-0.164	-0.1044	-0.3489	0.0264	-0.1896
	Rpt2	MKMDKSPTESYSDIGGLESQIQE	171	193		5.57747	6.59962	8.03805	9.33051	10.0682			MKMDKSPTESYSDIGGLESQIQE	171	193		5.20057	6.69887	7.61333	9.23647	10.1357			KMDKSPTESYSDIGGLESQ	172	190		-0.2986	-0.4216	-0.3261	-0.305	0.0076			KMDKSPTESYSDIGGLESQ	172	190		-0.2986	-0.4216	-0.3261	-0.305	0.0076
	Rpt2	KMDKSPTESYSDIGGLESQ	172	190		5.3323	6.06015	7.2538	8.07658	8.14681			KMDKSPTESYSDIGGLESQ	172	190		5.03373	5.63856	6.92769	7.77159	8.15441			MKMDKSPTESYSDIGGLESQIQE	171	193		-0.3769	0.0993	-0.4247	-0.094	0.0675			MKMDKSPTESYSDIGGLESQIQE	171	193		-0.3769	0.0993	-0.4247	-0.094	0.0675
	Rpt2	KMDKSPTESYSDIGGLESQIQE	172	193		4.99619	6.11551	7.23846	8.53829	9.32912			KMDKSPTESYSDIGGLESQIQE	172	193		5.02377	5.72017	7.03318	8.38768	9.10613			KMDKSPTESYSDIGGLESQIQE	172	193		0.0276	-0.3953	-0.2053	-0.1506	-0.223			KMDKSPTESYSDIGGLESQIQE	172	193		0.0276	-0.3953	-0.2053	-0.1506	-0.223
	Rpt2	SVELPLTHPEL	197	207		1.36584	1.43241	2.07047	2.8713	3.35279			SVELPLTHPEL	197	207		1.19041	1.42568	1.94384	2.82656	3.42419			SVELPLTHPEL	197	207		-0.1754	-0.0067	-0.1266	-0.0447	0.0714			SVELPLTHPEL	197	207		-0.1754	-0.0067	-0.1266	-0.0447	0.0714
	Rpt2	YGAPGTGKTLL	222	232		1.31711	1.97013	2.97806	3.85405	4.3123			YGAPGTGKTLL	222	232		1.3304	1.7486	2.98861	3.80355	4.14839			YGAPGTGKTLL	222	232		0.0133	-0.2215	0.0106	-0.0505	-0.1639			YGAPGTGKTLL	222	232		0.0133	-0.2215	0.0106	-0.0505	-0.1639
	Rpt2	YGAPGTGKTLLAKAVANQTSATF	222	244		2.17526	3.57808	5.57309	7.59452	8.58845			YGAPGTGKTLLAKAVANQTSATF	222	244		2.03965	3.29196	5.33562	7.11416	8.0735			YGAPGTGKTLLAKAVANQTSATF	222	244		-0.1356	-0.2861	-0.2375	-0.4804	-0.515			YGAPGTGKTLLAKAVANQTSATF	222	244		-0.1356	-0.2861	-0.2375	-0.4804	-0.515
	Rpt2	AKAVANQTSATF	233	244		1.70928	2.67093	3.99208	4.88481	5.14393			AKAVANQTSATF	233	244		1.78093	2.64298	4.0184	4.75266	5.14227			AKAVANQTSATF	233	244		0.0716	-0.0279	0.0263	-0.1321	-0.0017			AKAVANQTSATF	233	244		0.0716	-0.0279	0.0263	-0.1321	-0.0017
	Rpt2	LIQKYLGDGPRL	252	263		3.58532	4.49044	5.34105	5.54688	5.73304			LIQKYLGDGPRL	252	263		3.79119	4.52095	5.23	5.55513	5.64544			LIQKYLGDGPRL	252	263		0.2059	0.0305	-0.1111	0.0083	-0.0876			LIQKYLGDGPRL	252	263		0.2059	0.0305	-0.1111	0.0083	-0.0876
	Rpt2	IQKYLGDGPRL	253	263		2.78672	3.54134	4.34074	4.65828	4.57219			IQKYLGDGPRL	253	263		n/a	n/a	n/a	n/a	n/a			CRQIFKVAGENAPSIVF	264	280		-0.0884	-0.1891	-0.1819	-0.0706	0.2625			CRQIFKVAGENAPSIVF	264	280		-0.0884	-0.1891	-0.1819	-0.0706	0.2625
	Rpt2	CRQIFKVAGENAPSIVF	264	280		0.874672	1.44016	2.55851	3.44115	4.30931			CRQIFKVAGENAPSIVF	264	280		0.786246	1.25107	2.37664	3.37053	4.57177			KVAGENAPSIVF	269	280		-0.0616	-0.002	-0.0577	-0.0053	0.0618			KVAGENAPSIVF	269	280		-0.0616	-0.002	-0.0577	-0.0053	0.0618
	Rpt2	KVAGENAPSIVF	269	280		0.785726	1.10663	1.99487	2.58881	2.88951			KVAGENAPSIVF	269	280		0.724091	1.10465	1.93716	2.58348	2.95132			IDAIGTKRYDSNSGGERE	284	301			-0.0354	0.0012	-0.017	-0.1263			IDAIGTKRYDSNSGGERE	284	301		0	-0.0354	0.0012	-0.017	-0.1263
	Rpt2	IDAIGTKRYDSNSGGERE	284	301		n/a	7.31235	7.86055	8.30213	8.03494			IDAIGTKRYDSNSGGERE	284	301		6.86854	7.27697	7.86178	8.28511	7.90861			IDAIGTKRYDSNSGGEREIQRTML	284	307		-0.0687	-0.0464	-0.1358	0.0855	0.0091			IDAIGTKRYDSNSGGEREIQRTML	284	307		-0.0687	-0.0464	-0.1358	0.0855	0.0091
	Rpt2	IDAIGTKRYDSNSGGEREIQRTML	284	307		7.22027	8.58866	9.98143	10.766	10.831			IDAIGTKRYDSNSGGEREIQRTML	284	307		7.15153	8.54225	9.84561	10.8515	10.84			ELLNQLDGFDDRGDVKVIM	308	326		-0.1442	-0.0301	-0.1644	-0.0722	-0.0134			ELLNQLDGFDDRGDVKVIM	308	326		-0.1442	-0.0301	-0.1644	-0.0722	-0.0134
	Rpt2	ELLNQLDGFDDRGDVKVIM	308	326		2.99796	3.39667	4.90597	6.00789	6.67992			ELLNQLDGFDDRGDVKVIM	308	326		2.85372	3.36654	4.74158	5.93568	6.66649			LNQLDGFDDRGDVKVIM	310	326		-0.1511	0.1817	-0.2024	-0.0232	0.0266			LNQLDGFDDRGDVKVIM	310	326		-0.1511	0.1817	-0.2024	-0.0232	0.0266
	Rpt2	LNQLDGFDDRGDVKVIM	310	326		2.80118	3.21814	4.62213	5.37982	5.68859			LNQLDGFDDRGDVKVIM	310	326		2.65013	3.39987	4.41975	5.35663	5.7152			ATNKIETLDPAL	327	338		0.0299	0.0718	0.0361	0.1011	0.1915			ATNKIETLDPAL	327	338		0.0299	0.0718	0.0361	0.1011	0.1915
	Rpt2	ATNKIETLDPAL	327	338		2.37906	2.91609	3.64594	4.1743	4.39524			ATNKIETLDPAL	327	338		2.40892	2.98785	3.68202	4.27541	4.58672			IRPGRIDRKILFENPDL	339	355		-0.0079	-0.028	-0.0871	-0.0368	-0.2483			IRPGRIDRKILFENPDL	339	355		-0.0079	-0.028	-0.0871	-0.0368	-0.2483
	Rpt2	IRPGRIDRKILFENPDL	339	355		3.35001	4.11056	5.22102	6.1662	6.84527			IRPGRIDRKILFENPDL	339	355		3.34214	4.08252	5.13389	6.12937	6.59694			STKKKILGIHTSKMNL	356	371		0.1506	0.0049	-0.0235	-0.0583	0.0413			STKKKILGIHTSKMNL	356	371		0.1506	0.0049	-0.0235	-0.0583	0.0413
	Rpt2	STKKKILGIHTSKMNL	356	371		1.60353	2.48751	3.72913	5.18989	5.83488			STKKKILGIHTSKMNL	356	371		1.75416	2.49239	3.70568	5.13154	5.87616			VTTKDDLSGAD	381	391		-0.0521	0.0276	0.003	0.0149	0.2115			VTTKDDLSGAD	381	391		-0.0521	0.0276	0.003	0.0149	0.2115
	Rpt2	LVTTKDDLSGADIQAM	380	395		3.86099	4.34203	5.01558	5.86084	6.61754			LVTTKDDLSGADIQAM	380	395		3.84496	4.07305	4.70532	5.61871	6.75092			LVTTKDDLSGADIQAM	380	395		-0.016	-0.269	-0.3103	-0.2421	0.1334			LVTTKDDLSGADIQAM	380	395		-0.016	-0.269	-0.3103	-0.2421	0.1334
	Rpt2	VTTKDDLSGAD	381	391		3.47553	3.79439	4.14721	4.50006	4.42877			VTTKDDLSGAD	381	391		3.42346	3.82196	4.15024	4.51497	4.64025			VTTKDDLSGADIQA	381	394		0.1089	-0.0259	-0.0306	0.1454	0.4994			VTTKDDLSGADIQA	381	394		0.1089	-0.0259	-0.0306	0.1454	0.4994
	Rpt2	VTTKDDLSGADIQA	381	394		3.01111	3.5067	4.11808	4.68741	5.2423			VTTKDDLSGADIQA	381	394		3.12005	3.4808	4.08746	4.83282	5.74169			VTTKDDLSGADIQAM	381	395		0.0157	0.0334	-0.0009	0.1878	0.1857			VTTKDDLSGADIQAM	381	395		0.0157	0.0334	-0.0009	0.1878	0.1857
	Rpt2	VTTKDDLSGADIQAM	381	395		2.88636	3.35589	4.06466	4.68163	5.56558			VTTKDDLSGADIQAM	381	395		2.90206	3.38929	4.06377	4.86944	5.75125			MCTEAGL	395	401		0.017	-0.1004	-0.0311	-0.0631	0.053			MCTEAGL	395	401		0.017	-0.1004	-0.0311	-0.0631	0.053
	Rpt2	MCTEAGL	395	401		0.291285	0.522012	0.635894	0.767222	1.68106			MCTEAGL	395	401		0.308311	0.421574	0.604755	0.704113	1.73405			LALRERRMQVTAED	402	415		0.0376	-0.0344	0.0408	-0.0302	0.0427			LALRERRMQVTAED	402	415		0.0376	-0.0344	0.0408	-0.0302	0.0427
	Rpt2	LALRERRMQVTAED	402	415		2.18386	3.02135	4.08057	5.09481	6.44016			LALRERRMQVTAED	402	415		2.22145	2.98698	4.12142	5.06458	6.48282			FKQAKERVMKNKVEENLEG	416	434		0.4109	0.0448	0.0433	0.1299	-0.1942			FKQAKERVMKNKVEENLEG	416	434		0.4109	0.0448	0.0433	0.1299	-0.1942
	Rpt2	FKQAKERVMKNKVEENLEG	416	434		6.21875	7.17557	8.2139	9.13612	9.99939			FKQAKERVMKNKVEENLEG	416	434		6.62966	7.22036	8.25722	9.266	9.8052
	Protein	Sequence	Start	End		10 sec	1 min	10 min	1 hour	4 hours			Sequence	Start	End		10 sec	1 min	10 min	1 hour	4 hours
	Rpt3	LGIVTPVEKAVEEKPAVKSYASL	4	26		12.4944	13.3814	13.874	13.9339	13.7978			LGIVTPVEKAVEEKPAVKSYASL	4	26		12.5314	13.1053	13.5095	13.8325	13.7383			LGIVTPVEKAVEEKPAVKSYASL	4	26		0.037	-0.2761	-0.3645	-0.1014	-0.0595			LGIVTPVEKAVEEKPAVKSYASL	4	26		0.037	-0.2761	-0.3645	-0.1014	-0.0595
	Rpt3	GIVTPVEKAVEEKPAVKSYASL	5	26		11.3481	11.9197	12.5895	12.7418	12.4847			GIVTPVEKAVEEKPAVKSYASL	5	26		11.5355	12.2057	12.621	12.8935	12.731			GIVTPVEKAVEEKPAVKSYASL	5	26		0.1875	0.286	0.0315	0.1517	0.2464			GIVTPVEKAVEEKPAVKSYASL	5	26		0.1875	0.286	0.0315	0.1517	0.2464
	Rpt3	LAQLNGTVNNNSAL	27	40		7.38945	8.22707	8.31737	8.37165	8.21218			LAQLNGTVNNNSAL	27	40		7.75149	8.29322	8.06942	8.30371	8.30443			LAQLNGTVNNNSAL	27	40		0.362	0.0662	-0.2479	-0.0679	0.0922			LAQLNGTVNNNSAL	27	40		0.362	0.0662	-0.2479	-0.0679	0.0922
	Rpt3	NGTVNNNSAL	31	40		5.46721	5.48422	5.45684	5.60512	5.55903			NGTVNNNSAL	31	40		5.51414	5.37969	5.30211	5.51605	5.48814			NGTVNNNSAL	31	40		0.0469	-0.1045	-0.1547	-0.0891	-0.0709			NGTVNNNSAL	31	40		0.0469	-0.1045	-0.1547	-0.0891	-0.0709
	Rpt3	NGTVNNNSALSNVNSDIYF	31	49		8.92765	8.98291	9.86301	10.2691	10.0063			NGTVNNNSALSNVNSDIYF	31	49		8.66328	8.9662	9.46657	10.3036	9.81371			NGTVNNNSALSNVNSDIYF	31	49		-0.2644	-0.0167	-0.3964	0.0345	-0.1926			NGTVNNNSALSNVNSDIYF	31	49		-0.2644	-0.0167	-0.3964	0.0345	-0.1926
	Rpt3	SNVNSDIYF	41	49		3.39062	3.51781	4.43619	4.72295	4.74463			SNVNSDIYF	41	49		3.40962	3.54435	4.39751	4.80132	4.68449			SNVNSDIYF	41	49		0.019	0.0265	-0.0387	0.0784	-0.0601			SNVNSDIYF	41	49		0.019	0.0265	-0.0387	0.0784	-0.0601
	Rpt3	SNVNSDIYFKLKKLEKEYEL	41	60		2.54861	2.73049	3.86434	4.65637	4.8783			SNVNSDIYFKLKKLEKEYEL	41	60		2.42988	2.673	3.77922	4.64002	5.0243			SNVNSDIYFKLKKLEKEYEL	41	60		-0.1187	-0.0575	-0.0851	-0.0163	0.146			SNVNSDIYFKLKKLEKEYEL	41	60		-0.1187	-0.0575	-0.0851	-0.0163	0.146
	Rpt3	YIKDEQRHLKRELKRAQE	67	84		n/a	1.05093	2.01797	3.46572	4.88855			YIKDEQRHLKRELKRAQE	67	84		0.75094	0.988787	2.2295	3.5226	4.98503			YIKDEQRHLKRELKRAQE	67	84			-0.0621	0.2115	0.0569	0.0965			YIKDEQRHLKRELKRAQE	67	84			-0.0621	0.2115	0.0569	0.0965
	Rpt3	EVKRIQSVPLVIGQF	85	99		0.677334	1.08578	1.76687	2.81558	3.90869			EVKRIQSVPLVIGQF	85	99		0.667593	1.10454	1.81631	2.92576	4.00205			EVKRIQSVPLVIGQF	85	99		-0.0097	0.0188	0.0494	0.1102	0.0934			EVKRIQSVPLVIGQF	85	99		-0.0097	0.0188	0.0494	0.1102	0.0934
	Rpt3	FLEPIDQNTGIVSSTTGMS	99	117		4.69198	5.17929	5.81157	6.35296	6.37572			FLEPIDQNTGIVSSTTGMS	99	117		4.63961	5.29129	5.62897	6.31685	6.40037			FLEPIDQNTGIVSSTTGMS	99	117		-0.0524	0.112	-0.1826	-0.0361	0.0247			FLEPIDQNTGIVSSTTGMS	99	117		-0.0524	0.112	-0.1826	-0.0361	0.0247
	Rpt3	FLEPIDQNTGIVSSTTGMSY	99	118		4.56904	5.13058	5.83818	6.31246	6.40365			FLEPIDQNTGIVSSTTGMSY	99	118		4.64838	5.17031	5.7168	6.3776	6.51147			FLEPIDQNTGIVSSTTGMSY	99	118		0.0793	0.0397	-0.1214	0.0651	0.1078			FLEPIDQNTGIVSSTTGMSY	99	118		0.0793	0.0397	-0.1214	0.0651	0.1078
	Rpt3	YVVRILSTL	118	126		0.676331	1.25542	1.80187	2.08389	2.18456			YVVRILSTL	118	126		0.709477	1.27387	1.81553	2.20854	2.24139			YVVRILSTL	118	126		0.0331	0.0184	0.0137	0.1246	0.0568			YVVRILSTL	118	126		0.0331	0.0184	0.0137	0.1246	0.0568
	Rpt3	VVRILSTL	119	126		0.617891	1.11856	1.61118	1.93709	1.9055			VVRILSTL	119	126		0.638454	1.17058	1.61881	2.01668	2.01262			VVRILSTL	119	126		0.0206	0.052	0.0076	0.0796	0.1071			VVRILSTL	119	126		0.0206	0.052	0.0076	0.0796	0.1071
	Rpt3	VVRILSTLDRELLKPSMS	119	136		3.41215	5.20871	6.69325	7.98091	8.35482			VVRILSTLDRELLKPSMS	119	136		3.43101	5.1766	6.61174	7.97513	8.36896			VVRILSTLDRELLKPSMS	119	136		0.0189	-0.0321	-0.0815	-0.0058	0.0141			VVRILSTLDRELLKPSMS	119	136		0.0189	-0.0321	-0.0815	-0.0058	0.0141
	Rpt3	VDILPPDSDSSISVM	147	161		4.52228	4.71256	5.20204	5.46685	6.00346			VDILPPDSDSSISVM	147	161		4.75097	4.76037	5.02333	5.60459	6.0862			VDILPPDSDSSISVM	147	161		0.2287	0.0478	-0.1787	0.1377	0.0827			VDILPPDSDSSISVM	147	161		0.2287	0.0478	-0.1787	0.1377	0.0827
	Rpt3	VDILPPDSDSSISVMGENEKPDVTY	147	171		8.54119	8.61609	9.50914	10.3287	10.6959			VDILPPDSDSSISVMGENEKPDVTY	147	171		8.41907	8.8269	9.10498	10.1134	10.7024			VDILPPDSDSSISVMGENEKPDVTY	147	171		-0.1221	0.2108	-0.4042	-0.2154	0.0065			VDILPPDSDSSISVMGENEKPDVTY	147	171		-0.1221	0.2108	-0.4042	-0.2154	0.0065
	Rpt3	ADVGGLD	172	178		0.944384	1.18771	1.88215	2.25398	2.43678			ADVGGLD	172	178		0.914824	1.19855	1.89574	2.32681	2.61494			ADVGGLD	172	178		-0.0296	0.0108	0.0136	0.0728	0.1782			ADVGGLD	172	178		-0.0296	0.0108	0.0136	0.0728	0.1782
	Rpt3	ADVGGLDMQKQEIRE	172	186		2.84471	2.95925	3.76316	4.60349	5.53497			ADVGGLDMQKQEIRE	172	186		2.62115	2.87343	3.73571	4.64424	5.97334			ADVGGLDMQKQEIRE	172	186		-0.2236	-0.0858	-0.0275	0.0408	0.4384			ADVGGLDMQKQEIRE	172	186		-0.2236	-0.0858	-0.0275	0.0408	0.4384
	Rpt3	AVELPLVQ	187	194		1.06103	2.61567	3.53145	3.72174	3.77429			AVELPLVQ	187	194		1.42098	2.79416	3.39635	3.74802	3.83845			AVELPLVQ	187	194		0.36	0.1785	-0.1351	0.0263	0.0642			AVELPLVQ	187	194		0.36	0.1785	-0.1351	0.0263	0.0642
	Rpt3	AVELPLVQADL	187	197		2.71476	4.08422	5.06832	5.37524	5.41273			AVELPLVQADL	187	197		2.79096	4.10445	4.93865	5.42983	5.47154			AVELPLVQADL	187	197		0.0762	0.0202	-0.1297	0.0546	0.0588			AVELPLVQADL	187	197		0.0762	0.0202	-0.1297	0.0546	0.0588
	Rpt3	YEQIGIDPPRGVLL	198	211		1.73852	2.50176	3.65637	4.27122	4.2599			YEQIGIDPPRGVLL	198	211		1.73298	2.59321	3.73729	4.37974	4.45643			YEQIGIDPPRGVLL	198	211		-0.0055	0.0914	0.0809	0.1085	0.1965			YEQIGIDPPRGVLL	198	211		-0.0055	0.0914	0.0809	0.1085	0.1965
	Rpt3	LYGPPGTGKTML	211	222		1.26127	1.5828	2.57629	3.63728	4.33005			LYGPPGTGKTML	211	222		1.23674	1.63433	2.62835	3.82054	4.35981			LYGPPGTGKTML	211	222		-0.0245	0.0515	0.0521	0.1833	0.0298			LYGPPGTGKTML	211	222		-0.0245	0.0515	0.0521	0.1833	0.0298
	Rpt3	YGPPGTGKTML	212	222		1.06364	1.2956	2.13365	2.9187	3.32434			YGPPGTGKTML	212	222		0.981701	1.37965	2.22448	3.09532	3.46032			YGPPGTGKTML	212	222		-0.0819	0.0841	0.0908	0.1766	0.136			YGPPGTGKTML	212	222		-0.0819	0.0841	0.0908	0.1766	0.136
	Rpt3	VKAVANSTKAAF	223	234		1.55798	2.29893	3.36975	3.89123	4.02659			VKAVANSTKAAF	223	234		1.79689	2.33012	3.32144	4.02647	4.22496			VKAVANSTKAAF	223	234		0.2389	0.0312	-0.0483	0.1352	0.1984			VKAVANSTKAAF	223	234		0.2389	0.0312	-0.0483	0.1352	0.1984
	Rpt3	FVHKYLGEGPRM	242	253		2.73391	3.40712	4.11026	4.5495	4.38142			FVHKYLGEGPRM	242	253		2.87359	3.4837	4.16482	4.66988	4.51929			FVHKYLGEGPRM	242	253		0.1397	0.0766	0.0546	0.1204	0.1379			FVHKYLGEGPRM	242	253		0.1397	0.0766	0.0546	0.1204	0.1379
	Rpt3	IDEVDSIATKRFDAQTGSD	271	289		7.48769	8.21081	9.07503	9.56039	9.81708			IDEVDSIATKRFDAQTGSD	271	289		n/a	n/a	n/a	n/a	n/a			VDSIATKRFDAQTGSD	274	289		0.1031	0.4245	0.175	0.1452	0.031			VDSIATKRFDAQTGSD	274	289		0.1031	0.4245	0.175	0.1452	0.031
	Rpt3	IDEVDSIATKRFDAQTGSDREVQRIL	271	296		7.81551	9.43569	11.4434	12.703	13.2613			IDEVDSIATKRFDAQTGSDREVQRIL	271	296		7.67196	9.47467	11.4945	12.6609	13.3372			IDEVDSIATKRFDAQTGSDREVQRIL	271	296		-0.1435	0.039	0.0511	-0.0421	0.0759			IDEVDSIATKRFDAQTGSDREVQRIL	271	296		-0.1435	0.039	0.0511	-0.0421	0.0759
	Rpt3	VDSIATKRFDAQTGSD	274	289		6.6253	7.1693	7.83228	8.26037	8.0944			VDSIATKRFDAQTGSD	274	289		6.72844	7.5938	8.00726	8.4056	8.12543			VDSIATKRFDAQTGSDREVQRIL	274	296		-0.0669	0.1663	-0.0239	0.0559	-0.0017			VDSIATKRFDAQTGSDREVQRIL	274	296		-0.0669	0.1663	-0.0239	0.0559	-0.0017
	Rpt3	VDSIATKRFDAQTGSDREVQRIL	274	296		6.68476	8.1406	10.2062	11.1491	11.3095			VDSIATKRFDAQTGSDREVQRIL	274	296		6.61789	8.30687	10.1823	11.205	11.3078			ATNRADTLDPAL	317	328		0.0408	-0.001	-0.0042	0.0764	0.0185			ATNRADTLDPAL	317	328		0.0408	-0.001	-0.0042	0.0764	0.0185
	Rpt3	ATNRADTLDPAL	317	328		2.2058	2.63094	3.33795	3.67617	3.73979			ATNRADTLDPAL	317	328		2.24664	2.62994	3.33378	3.75254	3.7583			LRPGRLDRKIEF	329	340		0.0784	-0.0723	-0.0141	-0.107	-0.044			LRPGRLDRKIEF	329	340		0.0784	-0.0723	-0.0141	-0.107	-0.044
	Rpt3	LRPGRLDRKIEF	329	340		1.89384	2.2655	3.16702	3.99701	3.8898			LRPGRLDRKIEF	329	340		1.9722	2.19319	3.15293	3.89001	3.84581			SKMSLAPEADL	358	368		0.1822	-0.0075	0.0079	0.1024	0.0487			SKMSLAPEADL	358	368		0.1822	-0.0075	0.0079	0.1024	0.0487
	Rpt3	SKMSLAPEADL	358	368		1.49391	2.28262	3.3137	4.05627	4.37643			SKMSLAPEADL	358	368		1.67612	2.2751	3.32157	4.15863	4.42517			SLAPEADL	361	368		0.0187	-0.0266	0.0797	0.0537	0.2095			SLAPEADL	361	368		0.0187	-0.0266	0.0797	0.0537	0.2095
	Rpt3	SLAPEADL	361	368		1.33765	1.62131	1.95443	2.56464	2.66197			SLAPEADL	361	368		1.35637	1.59469	2.03412	2.61838	2.87143			IIRNDSLSGAVI	372	383		0.1948	0.1582	-0.0897	0.0025	-0.0301			IIRNDSLSGAVI	372	383		0.1948	0.1582	-0.0897	0.0025	-0.0301
	Rpt3	LIIRNDSLSGAVIAA	371	385		2.77092	4.39354	5.66856	6.18707	6.75176			LIIRNDSLSGAVIAA	371	385		2.97167	4.32841	5.46817	6.47494	6.73782			LIIRNDSLSGAVIAA	371	385		0.2008	-0.0651	-0.2004	0.2879	-0.0139			LIIRNDSLSGAVIAA	371	385		0.2008	-0.0651	-0.2004	0.2879	-0.0139
	Rpt3	IIRNDSLSGAVI	372	383		2.45993	3.58157	4.42954	4.77022	4.96162			IIRNDSLSGAVI	372	383		2.65474	3.73973	4.33983	4.77268	4.93149			IIRNDSLSGAVIA	372	384		0.1526	0.1615	-0.0782	0.1087	0.0269			IIRNDSLSGAVIA	372	384		0.1526	0.1615	-0.0782	0.1087	0.0269
	Rpt3	IIRNDSLSGAVIA	372	384		2.60921	3.82828	4.64131	5.13032	5.45642			IIRNDSLSGAVIA	372	384		2.76176	3.9898	4.56313	5.23897	5.48331			AIMQEAGL	385	392		-0.0143	-0.087	0.2647	0.11	0.3636			AIMQEAGL	385	392		-0.0143	-0.087	0.2647	0.11	0.3636
	Rpt3	AIMQEAGL	385	392		0.631971	0.6574	0.641773	0.629065	1.59551			AIMQEAGL	385	392		0.617628	0.570378	0.906505	0.739055	1.95906			IMQEAGL	386	392		0.0199	0.0102	0.0733	-0.1456	0.1444			IMQEAGL	386	392		0.0199	0.0102	0.0733	-0.1456	0.1444
	Rpt3	IMQEAGL	386	392		0.409404	0.487562	0.60382	0.817075	1.44166			IMQEAGL	386	392		0.429292	0.497805	0.677169	0.67146	1.58609			RAVRKNRYVIL	393	403		-0.0081	0.0789	0.0503	-0.0733	0.3761			RAVRKNRYVIL	393	403		-0.0081	0.0789	0.0503	-0.0733	0.3761
	Rpt3	RAVRKNRYVIL	393	403		0.605435	0.96954	1.51288	2.15629	3.0114			RAVRKNRYVIL	393	403		0.59729	1.04844	1.56313	2.08295	3.38752			YATQVKTDNTVDKF	411	424		0.0652	-0.1494	0.0706	-0.0861	-0.0309			YATQVKTDNTVDKF	411	424		0.0652	-0.1494	0.0706	-0.0861	-0.0309
	Rpt3	YATQVKTDNTVDKF	411	424		5.11537	5.56809	6.42524	6.94887	6.73956			YATQVKTDNTVDKF	411	424		5.18057	5.41874	6.49581	6.86276	6.70866			YATQVKTDNTVDKFDFYK	411	428		0.0779	-0.0367	-0.0812	0.1074	-0.0185			YATQVKTDNTVDKFDFYK	411	428		0.0779	-0.0367	-0.0812	0.1074	-0.0185
	Rpt3	YATQVKTDNTVDKFDFYK	411	428		6.29465	7.00519	7.90993	8.21189	8.13108			YATQVKTDNTVDKFDFYK	411	428		6.37256	6.96847	7.82871	8.31931	8.11259
	Protein	Sequence	Start	End		10 sec	1 min	10 min	1 hour	4 hours			Sequence	Start	End		10 sec	1 min	10 min	1 hour	4 hours
	Rpt4	YDKTENDIKALQSIGQL	88	104		0.942055	1.62576	3.05422	4.23562	5.38028			YDKTENDIKALQSIGQL	88	104		0.871667	1.84561	3.11904	4.27572	4.94158			YDKTENDIKALQSIGQL	88	104		-0.0704	0.2199	0.0648	0.0401	-0.4387			YDKTENDIKALQSIGQL	88	104		-0.0704	0.2199	0.0648	0.0401	-0.4387
	Rpt4	RILPRETDPLVYNM	157	170		3.90677	4.66107	5.04429	5.18915	5.28729			RILPRETDPLVYNM	157	170		3.42614	4.2901	4.86953	5.24221	5.26173			RILPRETDPLVYNM	157	170		-0.4806	-0.371	-0.1748	0.0531	-0.0256			RILPRETDPLVYNM	157	170		-0.4806	-0.371	-0.1748	0.0531	-0.0256
	Rpt4	TSFEQGEITF	171	180		4.41278	4.69755	4.68395	4.81743	4.73182			TSFEQGEITF	171	180		4.78676	4.81996	4.82405	4.86635	4.90145			TSFEQGEITF	171	180		0.374	0.1224	0.1401	0.0489	0.1696			TSFEQGEITF	171	180		0.374	0.1224	0.1401	0.0489	0.1696
	Rpt4	DGIGGLTEQIRE	181	192		1.77851	2.82458	3.91744	4.67035	5.27235			DGIGGLTEQIRE	181	192		2.04369	3.19352	3.84187	4.81198	5.28645			DGIGGLTEQIRE	181	192		0.2652	0.3689	-0.0756	0.1416	0.0141			DGIGGLTEQIRE	181	192		0.2652	0.3689	-0.0756	0.1416	0.0141
	Rpt4	VIELPLKNPEI	196	206		1.48203	2.73936	4.06488	4.44904	4.62711			VIELPLKNPEI	196	206		1.68344	2.92463	3.99631	4.49149	4.71299			VIELPLKNPEI	196	206		0.2014	0.1853	-0.0686	0.0424	0.0859			VIELPLKNPEI	196	206		0.2014	0.1853	-0.0686	0.0424	0.0859
	Rpt4	VIELPLKNPEIFQRVGIKPPKGVL	196	219		3.55669	6.28476	9.03524	10.1923	10.5361			VIELPLKNPEIFQRVGIKPPKGVL	196	219		3.82026	6.71089	8.84518	10.3446	10.6313			VIELPLKNPEIFQRVGIKPPKGVL	196	219		0.2636	0.4261	-0.1901	0.1523	0.0952			VIELPLKNPEIFQRVGIKPPKGVL	196	219		0.2636	0.4261	-0.1901	0.1523	0.0952
	Rpt4	QRVGIKPPKGVLL	208	220		1.67228	2.43785	3.45988	3.95252	3.94772			QRVGIKPPKGVLL	208	220		1.58904	2.5521	3.50354	3.94784	4.13506			QRVGIKPPKGVLL	208	220		-0.0832	0.1142	0.0437	-0.0047	0.1873			QRVGIKPPKGVLL	208	220		-0.0832	0.1142	0.0437	-0.0047	0.1873
	Rpt4	YGPPGTGKTLLAKAVAATIGAN	221	242		1.80873	2.94984	4.72013	5.55589	6.10051			YGPPGTGKTLLAKAVAATIGAN	221	242		2.1709	3.00394	4.81157	5.44675	6.22574			YGPPGTGKTLLAKAVAATIGAN	221	242		0.3622	0.0541	0.0914	-0.1091	0.1252			YGPPGTGKTLLAKAVAATIGAN	221	242		0.3622	0.0541	0.0914	-0.1091	0.1252
	Rpt4	YGPPGTGKTLLAKAVAATIGANF	221	243		1.97643	3.23701	5.26915	6.10217	6.56793			YGPPGTGKTLLAKAVAATIGANF	221	243		1.95587	3.43187	5.25036	6.10624	6.55784			YGPPGTGKTLLAKAVAATIGANF	221	243		-0.0206	0.1949	-0.0188	0.0041	-0.0101			YGPPGTGKTLLAKAVAATIGANF	221	243		-0.0206	0.1949	-0.0188	0.0041	-0.0101
	Rpt4	ATIGANF	237	243		1.44457	2.65365	3.56107	3.66126	3.69574			ATIGANF	237	243		1.5393	2.71136	3.51951	3.708	3.71698			ATIGANF	237	243		0.0947	0.0577	-0.0416	0.0467	0.0212			ATIGANF	237	243		0.0947	0.0577	-0.0416	0.0467	0.0212
	Rpt4	FIFSPASGIVDKYIGE	243	258		4.79914	5.20706	6.84131	8.00283	8.31373			FIFSPASGIVDKYIGE	243	258		3.99756	5.43619	7.08367	8.21282	8.46169			FIFSPASGIVDKYIGE	243	258		-0.8016	0.2291	0.2424	0.21	0.148			FIFSPASGIVDKYIGE	243	258		-0.8016	0.2291	0.2424	0.21	0.148
	Rpt4	IFSPASGIVDKYIGE	244	258		3.95101	5.2461	6.70057	7.561	7.67397			IFSPASGIVDKYIGE	244	258		4.09293	5.32791	6.73379	7.51373	7.6078			IFSPASGIVDKYIGE	244	258		0.1419	0.0818	0.0332	-0.0473	-0.0662			IFSPASGIVDKYIGE	244	258		0.1419	0.0818	0.0332	-0.0473	-0.0662
	Rpt4	YAKEHEPCIIF	269	279		0.371559	0.685742	0.971559	1.18323	1.20395			YAKEHEPCIIF	269	279		0.400256	0.682651	1.10561	1.29128	1.33985			YAKEHEPCIIF	269	279		0.0287	-0.0031	0.1341	0.1081	0.1359			YAKEHEPCIIF	269	279		0.0287	-0.0031	0.1341	0.1081	0.1359
	Rpt4	YAKEHEPCIIFM	269	280		0.330598	0.528238	0.878072	1.11478	1.08546			YAKEHEPCIIFM	269	280		0.298081	0.474045	0.823305	1.02817	1.05599			YAKEHEPCIIFM	269	280		-0.0325	-0.0542	-0.0548	-0.0866	-0.0295			YAKEHEPCIIFM	269	280		-0.0325	-0.0542	-0.0548	-0.0866	-0.0295
	Rpt4	DGFDNLGQTKIIM	313	325		3.32255	3.75088	4.1726	4.67174	5.19914			DGFDNLGQTKIIM	313	325		3.16699	3.6971	4.0978	4.80973	5.25992			DGFDNLGQTKIIM	313	325		-0.1556	-0.0538	-0.0748	0.138	0.0608			DGFDNLGQTKIIM	313	325		-0.1556	-0.0538	-0.0748	0.138	0.0608
	Rpt4	FDNLGQTKIIM	315	325		1.8757	2.27051	2.73636	3.18228	3.55746			FDNLGQTKIIM	315	325		2.05959	2.38009	2.73794	3.29502	3.78325			FDNLGQTKIIM	315	325		0.1839	0.1096	0.0016	0.1127	0.2258			FDNLGQTKIIM	315	325		0.1839	0.1096	0.0016	0.1127	0.2258
	Rpt4	ATNRPDTLDPAL	326	337		1.50832	1.86571	2.45916	3.00474	3.05692			ATNRPDTLDPAL	326	337		1.51269	1.91925	2.47403	3.10131	3.2153			ATNRPDTLDPAL	326	337		0.0044	0.0535	0.0149	0.0966	0.1584			ATNRPDTLDPAL	326	337		0.0044	0.0535	0.0149	0.0966	0.1584
	Rpt4	LRPGRLDRKVEIPLPNEAGRL	338	358		2.78676	3.49957	5.39412	6.70015	6.85059			LRPGRLDRKVEIPLPNEAGRL	338	358		2.88532	3.61571	5.15105	6.61135	6.82386			LRPGRLDRKVEIPLPNEAGRL	338	358		0.0986	0.1161	-0.2431	-0.0888	-0.0267			LRPGRLDRKVEIPLPNEAGRL	338	358		0.0986	0.1161	-0.2431	-0.0888	-0.0267
	Rpt4	LRPGRLDRKVEIPLPNEAGRLEI	338	360		2.83884	3.47331	4.92493	6.43954	7.24457			LRPGRLDRKVEIPLPNEAGRLEI	338	360		2.58216	3.37982	4.97163	6.47801	7.25068			LRPGRLDRKVEIPLPNEAGRLEI	338	360		-0.2567	-0.0935	0.0467	0.0385	0.0061			LRPGRLDRKVEIPLPNEAGRLEI	338	360		-0.2567	-0.0935	0.0467	0.0385	0.0061
	Rpt4	DRKVEIPLPNEAGRLEIF	344	361		2.04592	2.65214	3.68003	4.60181	4.9344			DRKVEIPLPNEAGRLEIF	344	361		2.00985	2.37348	3.81066	4.55027	5.31192			DRKVEIPLPNEAGRLEIF	344	361		-0.0361	-0.2787	0.1306	-0.0515	0.3775			DRKVEIPLPNEAGRLEIF	344	361		-0.0361	-0.2787	0.1306	-0.0515	0.3775
	Rpt4	EIFKIHTAKVKKTGEF	359	374		3.13736	3.55758	4.5408	4.68286	4.53777			EIFKIHTAKVKKTGEF	359	374		3.2576	3.66536	4.41019	4.69939	4.74581			EIFKIHTAKVKKTGEF	359	374		0.1202	0.1078	-0.1306	0.0165	0.208			EIFKIHTAKVKKTGEF	359	374		0.1202	0.1078	-0.1306	0.0165	0.208
	Rpt4	FKIHTAKVKKTGEF	361	374		3.12433	3.92582	4.61156	4.74526	4.6018			FKIHTAKVKKTGEF	361	374		3.44271	3.89295	4.56746	4.76046	4.41228			FKIHTAKVKKTGEF	361	374		0.3184	-0.0329	-0.0441	0.0152	-0.1895			FKIHTAKVKKTGEF	361	374		0.3184	-0.0329	-0.0441	0.0152	-0.1895
	Rpt4	VKMSDGFNGAD	380	390		1.35276	1.79374	2.5518	2.78311	3.22337			VKMSDGFNGAD	380	390		1.2147	1.7989	2.60784	3.05712	3.76702			VKMSDGFNGAD	380	390		-0.1381	0.0052	0.056	0.274	0.5436			VKMSDGFNGAD	380	390		-0.1381	0.0052	0.056	0.274	0.5436
	Rpt4	VKMSDGFNGADIRNCATEAGF	380	400		1.32992	1.58342	1.95682	2.65032	5.92549			VKMSDGFNGADIRNCATEAGF	380	400		1.32486	1.54574	2.2299	2.91695	7.54469			VKMSDGFNGADIRNCATEAGF	380	400		-0.0051	-0.0377	0.2731	0.2666	1.6192			VKMSDGFNGADIRNCATEAGF	380	400		-0.0051	-0.0377	0.2731	0.2666	1.6192
	Rpt4	IRNCATEAGF	391	400		0.712637	0.768722	0.991493	1.94702	2.75377			IRNCATEAGF	391	400		0.756198	0.707627	1.34684	1.83933	3.48392			IRNCATEAGF	391	400		0.0436	-0.0611	0.3554	-0.1077	0.7302			IRNCATEAGF	391	400		0.0436	-0.0611	0.3554	-0.1077	0.7302
	Rpt4	FAIRDDRDHINPDDL	401	415		1.00746	1.17098	1.46972	1.86625	2.41617			FAIRDDRDHINPDDL	401	415		1.04458	1.21633	1.48263	1.88322	2.78133			FAIRDDRDHINPDDL	401	415		0.0371	0.0454	0.0129	0.017	0.3652			FAIRDDRDHINPDDL	401	415		0.0371	0.0454	0.0129	0.017	0.3652
	Rpt4	FAIRDDRDHINPDDLM	401	416		1.21445	1.28961	1.79347	2.60564	3.38616			FAIRDDRDHINPDDLM	401	416		1.16474	1.27958	1.68124	2.37163	3.6763			FAIRDDRDHINPDDLM	401	416		-0.0497	-0.01	-0.1122	-0.234	0.2901			FAIRDDRDHINPDDLM	401	416		-0.0497	-0.01	-0.1122	-0.234	0.2901
	Rpt4	MKAVRKVAEVKKLEGTIE	416	433		4.82411	5.52425	6.49461	7.3477	8.14975			MKAVRKVAEVKKLEGTIE	416	433		4.94292	5.53102	6.3536	7.37361	8.23075			MKAVRKVAEVKKLEGTIE	416	433		0.1188	0.0068	-0.141	0.0259	0.081			MKAVRKVAEVKKLEGTIE	416	433		0.1188	0.0068	-0.141	0.0259	0.081
	Protein	Sequence	Start	End		10 sec	1 min	10 min	1 hour	4 hours			Sequence	Start	End		10 sec	1 min	10 min	1 hour	4 hours
	Rpt5	DAQTLPGDDEL	8	18		3.47427	3.50561	3.66375	3.68741	3.47833			DAQTLPGDDEL	8	18		3.55138	3.58248	3.5391	3.80065	3.60686			DAQTLPGDDEL	8	18		0.0771	0.0769	-0.1247	0.1132	0.1285			DAQTLPGDDEL	8	18		0.0771	0.0769	-0.1247	0.1132	0.1285
	Rpt5	DAQTLPGDDELDQEILNL	8	25		6.18112	7.13178	7.87138	7.90615	7.99894			DAQTLPGDDELDQEILNL	8	25		6.08226	7.37478	7.6826	7.94093	7.929			DAQTLPGDDELDQEILNL	8	25		-0.0989	0.243	-0.1888	0.0348	-0.0699			DAQTLPGDDELDQEILNL	8	25		-0.0989	0.243	-0.1888	0.0348	-0.0699
	Rpt5	DQEILNL	19	25		1.53893	2.59463	3.04399	3.04095	2.9796			DQEILNL	19	25		1.57612	2.58294	2.9621	3.05634	2.97465			DQEILNL	19	25		0.0372	-0.0117	-0.0819	0.0154	-0.005			DQEILNL	19	25		0.0372	-0.0117	-0.0819	0.0154	-0.005
	Rpt5	STQELQT	26	32		n/a	1.6962	2.58485	3.2282	3.57469			STQELQT	26	32		1.04693	1.74625	2.58209	3.21438	3.66773			STQELQT	26	32			0.0501	-0.0028	-0.0138	0.093			STQELQT	26	32			0.0501	-0.0028	-0.0138	0.093
	Rpt5	STQELQTRAKL	26	36		0.786076	1.41928	2.68445	4.66323	6.12571			STQELQTRAKL	26	36		0.814288	1.43216	2.72404	4.67859	6.26076			STQELQTRAKL	26	36		0.0282	0.0129	0.0396	0.0154	0.1351			STQELQTRAKL	26	36		0.0282	0.0129	0.0396	0.0154	0.1351
	Rpt5	STQELQTRAKLLDNE	26	40		1.03232	1.70797	3.40467	6.06114	7.73117			STQELQTRAKLLDNE	26	40		0.993152	1.63776	3.3505	6.11018	7.6362			STQELQTRAKLLDNE	26	40		-0.0392	-0.0702	-0.0542	0.049	-0.095			STQELQTRAKLLDNE	26	40		-0.0392	-0.0702	-0.0542	0.049	-0.095
	Rpt5	QRLSHENNVM	49	58		n/a	1.02452	1.88968	2.81214	2.93987			QRLSHENNVM	49	58		0.56622	1.01898	1.91135	2.79155	3.01265			QRLSHENNVM	49	58			-0.0055	0.0217	-0.0206	0.0728			QRLSHENNVM	49	58			-0.0055	0.0217	-0.0206	0.0728
	Rpt5	LEKIKDNKEKIKNNRQLPYLVA	59	80		1.08089	1.74878	2.88332	3.9383	4.6014			LEKIKDNKEKIKNNRQLPYLVA	59	80		1.07904	1.7032	3.00515	4.13432	4.63018			LEKIKDNKEKIKNNRQLPYLVA	59	80		-0.0018	-0.0456	0.1218	0.196	0.0288			LEKIKDNKEKIKNNRQLPYLVA	59	80		-0.0018	-0.0456	0.1218	0.196	0.0288
	Rpt5	LEKIKDNKEKIKNNRQLPYLVAN	59	81		1.30738	1.92759	3.1162	4.34488	4.99559			LEKIKDNKEKIKNNRQLPYLVAN	59	81		1.19718	1.84251	3.28174	4.40587	4.87755			LEKIKDNKEKIKNNRQLPYLVAN	59	81		-0.1102	-0.0851	0.1655	0.061	-0.118			LEKIKDNKEKIKNNRQLPYLVAN	59	81		-0.1102	-0.0851	0.1655	0.061	-0.118
	Rpt5	VVEVMDM	82	88		1.05823	1.53498	1.90339	1.94964	1.97255			VVEVMDM	82	88		1.00716	1.5097	1.81071	1.88668	2.02304			VVEVMDM	82	88		-0.0511	-0.0253	-0.0927	-0.063	0.0505			VVEVMDM	82	88		-0.0511	-0.0253	-0.0927	-0.063	0.0505
	Rpt5	LVDPDKLKPNDL	134	145		0.829291	1.64765	2.69979	3.31955	3.64333			LVDPDKLKPNDL	134	145		0.916858	1.70231	2.72047	3.50015	3.7638			LVDPDKLKPNDL	134	145		0.0876	0.0547	0.0207	0.1806	0.1205			LVDPDKLKPNDL	134	145		0.0876	0.0547	0.0207	0.1806	0.1205
	Rpt5	LVDPDKLKPNDLVGVNKDSY	134	153		1.35342	2.32701	3.76461	4.77734	5.19004			LVDPDKLKPNDLVGVNKDSY	134	153		1.36538	2.30718	3.82845	4.70355	5.34472			LVDPDKLKPNDLVGVNKDSY	134	153		0.012	-0.0198	0.0638	-0.0738	0.1547			LVDPDKLKPNDLVGVNKDSY	134	153		0.012	-0.0198	0.0638	-0.0738	0.1547
	Rpt5	VGVNKDSY	146	153		n/a	0.370181	0.586929	1.11738	1.37511			VGVNKDSY	146	153		0.335871	0.349903	0.6453	1.07149	1.30102			VGVNKDSY	146	153			-0.0203	0.0584	-0.0459	-0.0741			VGVNKDSY	146	153			-0.0203	0.0584	-0.0459	-0.0741
	Rpt5	ILDTLPSEF	155	163		1.8799	2.04951	2.48413	2.58737	2.72467			ILDTLPSEF	155	163		1.96117	2.07556	2.47736	2.57766	2.82957			ILDTLPSEF	155	163		0.0813	0.0261	-0.0068	-0.0097	0.1049			ILDTLPSEF	155	163		0.0813	0.0261	-0.0068	-0.0097	0.1049
	Rpt5	ILDTLPSEFDSRVKAME	155	171		6.60704	6.94223	7.78854	7.93895	8.15734			ILDTLPSEFDSRVKAME	155	171		6.09891	7.23659	7.5806	7.99894	8.05513			DTLPSEF	157	163		0.0338	-0.0036	0.0483	0.0759	0.0734			DTLPSEF	157	163		0.0338	-0.0036	0.0483	0.0759	0.0734
	Rpt5	DTLPSEF	157	163		1.6798	1.80749	1.76933	1.90532	2.02252			DTLPSEF	157	163		1.71358	1.8039	1.81766	1.98125	2.0959			ILDTLPSEFDSRVKAME	155	171		-0.5081	0.2944	-0.2079	0.06	-0.1022			ILDTLPSEFDSRVKAME	155	171		-0.5081	0.2944	-0.2079	0.06	-0.1022
	Rpt5	DTLPSEFDSRVKAME	157	171		6.54358	7.17151	7.93666	7.98356	8.07817			DTLPSEFDSRVKAME	157	171		6.53358	7.22938	7.67037	8.01388	8.1528			DTLPSEFDSRVKAME	157	171		-0.01	0.0579	-0.2663	0.0303	0.0746			DTLPSEFDSRVKAME	157	171		-0.01	0.0579	-0.2663	0.0303	0.0746
	Rpt5	MEVDEKPTETYSDVGGLDKQIEE	170	192		6.14237	7.22486	9.1947	10.2163	10.7171			MEVDEKPTETYSDVGGLDKQIEE	170	192		5.98847	7.75812	8.98417	10.1028	10.5495			MEVDEKPTETYSDVGGLDKQIEE	170	192		-0.1539	0.5333	-0.2105	-0.1136	-0.1676			MEVDEKPTETYSDVGGLDKQIEE	170	192		-0.1539	0.5333	-0.2105	-0.1136	-0.1676
	Rpt5	VDEKPTETYSDVGGLDKQIEE	172	192		5.73387	6.54195	7.76538	8.61655	9.03057			VDEKPTETYSDVGGLDKQIEE	172	192		5.79177	6.6081	7.7637	8.72617	9.05443			VDEKPTETYSDVGGLDKQIEE	172	192		0.0579	0.0661	-0.0017	0.1096	0.0239			VDEKPTETYSDVGGLDKQIEE	172	192		0.0579	0.0661	-0.0017	0.1096	0.0239
	Rpt5	VDEKPTETYSDVGGLDKQIEEL	172	193		5.55561	6.46905	7.7371	8.7243	9.16782			VDEKPTETYSDVGGLDKQIEEL	172	193		5.61705	6.7519	7.66639	8.92531	9.34238			VDEKPTETYSDVGGLDKQIEEL	172	193		0.0614	0.2829	-0.0707	0.201	0.1746			VDEKPTETYSDVGGLDKQIEEL	172	193		0.0614	0.2829	-0.0707	0.201	0.1746
	Rpt5	YSDVGGLDKQIEE	180	192		2.03914	2.5425	3.46839	4.24246	4.84844			YSDVGGLDKQIEE	180	192		2.20281	2.79991	3.58471	4.36843	4.89093			YSDVGGLDKQIEE	180	192		0.1637	0.2574	0.1163	0.126	0.0425			YSDVGGLDKQIEE	180	192		0.1637	0.2574	0.1163	0.126	0.0425
	Rpt5	ARACAAQTNATF	232	243		1.92015	2.63283	3.73267	4.79783	5.21261			ARACAAQTNATF	232	243		1.9867	2.62365	3.72524	4.7607	5.18291			ARACAAQTNATF	232	243		0.0665	-0.0092	-0.0074	-0.0371	-0.0297			ARACAAQTNATF	232	243		0.0665	-0.0092	-0.0074	-0.0371	-0.0297
	Rpt5	AQTNATF	237	243		1.38328	1.7837	2.55527	3.09889	3.24135			AQTNATF	237	243		1.4668	1.89348	2.34356	3.12994	3.24187			AQTNATF	237	243		0.0835	0.1098	-0.2117	0.031	0.0005			AQTNATF	237	243		0.0835	0.1098	-0.2117	0.031	0.0005
	Rpt5	LKLAAPQL	244	251		0.564734	1.15986	1.58544	2.37831	2.95678			LKLAAPQL	244	251		0.703343	1.15283	1.76394	2.50399	3.11288			LKLAAPQL	244	251		0.1386	-0.007	0.1785	0.1257	0.1561			LKLAAPQL	244	251		0.1386	-0.007	0.1785	0.1257	0.1561
	Rpt5	YIGEGAKL	255	262		1.11281	1.70101	2.42965	3.07915	3.31575			YIGEGAKL	255	262		1.09837	1.62144	2.40402	3.02322	3.47376			YIGEGAKL	255	262		-0.0144	-0.0796	-0.0256	-0.0559	0.158			YIGEGAKL	255	262		-0.0144	-0.0796	-0.0256	-0.0559	0.158
	Rpt5	VRDAFALAKEKAPTIIF	263	279		0.44493	0.621196	0.75543	1.52759	2.33646			VRDAFALAKEKAPTIIF	263	279		0.526152	0.632008	0.765755	1.41357	2.60811			VRDAFALAKEKAPTIIF	263	279		0.0812	0.0108	0.0103	-0.114	0.2717			VRDAFALAKEKAPTIIF	263	279		0.0812	0.0108	0.0103	-0.114	0.2717
	Rpt5	ALAKEKAPTIIF	268	279		0.477758	0.488273	0.643545	1.41383	2.22628			ALAKEKAPTIIF	268	279		0.431604	0.390377	0.645878	1.31491	2.28383			ALAKEKAPTIIF	268	279		-0.0462	-0.0979	0.0023	-0.0989	0.0576			ALAKEKAPTIIF	268	279		-0.0462	-0.0979	0.0023	-0.0989	0.0576
	Rpt5	LAKEKAPTIIF	269	279		0.327485	0.27288	0.459016	1.34806	2.12155			LAKEKAPTIIF	269	279		0.298497	0.248411	0.48909	1.17615	2.03271			LAKEKAPTIIF	269	279		-0.029	-0.0245	0.0301	-0.1719	-0.0888			LAKEKAPTIIF	269	279		-0.029	-0.0245	0.0301	-0.1719	-0.0888
	Rpt5	LDAIGTKRFDSEKSGDREVQRTM	283	305		5.97557	7.26296	8.53692	9.53539	9.88255			LDAIGTKRFDSEKSGDREVQRTM	283	305		6.13333	6.93524	8.45072	9.56229	9.92452			LDAIGTKRFDSEKSGDREVQRTM	283	305		0.1578	-0.3277	-0.0862	0.0269	0.042			LDAIGTKRFDSEKSGDREVQRTM	283	305		0.1578	-0.3277	-0.0862	0.0269	0.042
	Rpt5	ELLNQLDGFSSDDRVKVL	307	324		3.04868	3.15059	3.66926	4.26255	4.86838			ELLNQLDGFSSDDRVKVL	307	324		3.01645	3.13134	3.71311	4.33052	4.94409			ELLNQLDGFSSDDRVKVL	307	324		-0.0322	-0.0193	0.0438	0.068	0.0757			ELLNQLDGFSSDDRVKVL	307	324		-0.0322	-0.0193	0.0438	0.068	0.0757
	Rpt5	LNQLDGFSSDDRVKVL	309	324		2.69745	3.0065	3.51137	3.98444	4.35922			LNQLDGFSSDDRVKVL	309	324		2.78997	2.96633	3.54161	4.11479	4.564			LNQLDGFSSDDRVKVL	309	324		0.0925	-0.0402	0.0302	0.1304	0.2048			LNQLDGFSSDDRVKVL	309	324		0.0925	-0.0402	0.0302	0.1304	0.2048
	Rpt5	AATNRVDVLDPAL	325	337		1.54423	2.20707	3.46986	4.16709	4.68619			AATNRVDVLDPAL	325	337		1.65109	2.29308	3.3692	4.27904	4.86891			AATNRVDVLDPAL	325	337		0.1069	0.086	-0.1007	0.1119	0.1827			AATNRVDVLDPAL	325	337		0.1069	0.086	-0.1007	0.1119	0.1827
	Rpt5	AATNRVDVLDPALL	325	338		1.70044	2.2513	3.57698	4.37805	5.05095			AATNRVDVLDPALL	325	338		1.72971	2.20622	3.39931	4.49469	5.19609			AATNRVDVLDPALL	325	338		0.0293	-0.0451	-0.1777	0.1166	0.1451			AATNRVDVLDPALL	325	338		0.0293	-0.0451	-0.1777	0.1166	0.1451
	Rpt5	DRKIEFPLPSEDSRA	344	358		2.55119	3.05862	4.06196	4.455	4.87071			DRKIEFPLPSEDSRA	344	358		2.48462	3.03631	3.99842	4.7175	4.92598			DRKIEFPLPSEDSRA	344	358		-0.0666	-0.0223	-0.0635	0.2625	0.0553			DRKIEFPLPSEDSRA	344	358		-0.0666	-0.0223	-0.0635	0.2625	0.0553
	Rpt5	DRKIEFPLPSEDSRAQIL	344	361		2.30851	3.06014	4.30426	5.24953	5.58427			DRKIEFPLPSEDSRAQIL	344	361		2.36122	2.76686	4.24383	5.01423	5.51417			DRKIEFPLPSEDSRAQIL	344	361		0.0527	-0.2933	-0.0604	-0.2353	-0.0701			DRKIEFPLPSEDSRAQIL	344	361		0.0527	-0.2933	-0.0604	-0.2353	-0.0701
	Rpt5	QIHSRKMTTDDDINW	362	376		1.83038	3.21312	4.08289	4.4902	4.17385			QIHSRKMTTDDDINW	362	376		1.81705	3.10769	4.2723	4.42855	4.15941			QIHSRKMTTDDDINW	362	376		-0.0133	-0.1054	0.1894	-0.0616	-0.0144			QIHSRKMTTDDDINW	362	376		-0.0133	-0.1054	0.1894	-0.0616	-0.0144
	Rpt5	QIHSRKMTTDDDINWQEL	362	379		2.07105	3.447	4.93274	5.15228	5.168			QIHSRKMTTDDDINWQEL	362	379		2.29272	3.45013	4.97821	5.20673	5.13896			QIHSRKMTTDDDINWQEL	362	379		0.2217	0.0031	0.0455	0.0544	-0.029			QIHSRKMTTDDDINWQEL	362	379		0.2217	0.0031	0.0455	0.0544	-0.029
	Rpt5	DINWQEL	373	379		1.07752	1.66277	2.41589	2.50854	2.55561			DINWQEL	373	379		1.04809	1.506	2.35919	2.54865	2.54998			DINWQEL	373	379		-0.0294	-0.1568	-0.0567	0.0401	-0.0056			DINWQEL	373	379		-0.0294	-0.1568	-0.0567	0.0401	-0.0056
	Rpt5	QELARSTDEFNGAQL	377	391		1.22388	1.82235	3.29316	4.21503	4.55608			QELARSTDEFNGAQL	377	391		1.1907	1.70642	3.24928	4.21291	4.49189			QELARSTDEFNGAQL	377	391		-0.0332	-0.1159	-0.0439	-0.0021	-0.0642			QELARSTDEFNGAQL	377	391		-0.0332	-0.1159	-0.0439	-0.0021	-0.0642
	Rpt5	ARSTDEFNGAQL	380	391		0.841691	1.39171	2.41362	3.09503	3.30554			ARSTDEFNGAQL	380	391		0.946412	1.3358	2.47657	3.12893	3.32316			ARSTDEFNGAQL	380	391		0.1047	-0.0559	0.063	0.0339	0.0176			ARSTDEFNGAQL	380	391		0.1047	-0.0559	0.063	0.0339	0.0176
	Rpt5	KAVTVEAGM	392	400		0.361256	0.352759	0.370491	0.372628	0.3755			KAVTVEAGM	392	400		0.379634	0.347374	0.400516	0.441035	0.521521			KAVTVEAGM	392	400		0.0184	-0.0054	0.03	0.0684	0.146			KAVTVEAGM	392	400		0.0184	-0.0054	0.03	0.0684	0.146
	Rpt5	VTVEAGM	394	400		0.331502	0.393745	0.466892	0.584018	0.615538			VTVEAGM	394	400		0.383839	0.404528	0.47836	0.49421	0.57224			VTVEAGM	394	400		0.0523	0.0108	0.0115	-0.0898	-0.0433			VTVEAGM	394	400		0.0523	0.0108	0.0115	-0.0898	-0.0433
	Rpt5	IALRNGQSSVKHEDF	401	415		n/a	1.59766	2.19969	2.50887	2.69669			IALRNGQSSVKHEDF	401	415		0.905171	1.29986	2.15791	2.4485	2.57196			IALRNGQSSVKHEDF	401	415			-0.2978	-0.0418	-0.0604	-0.1247			IALRNGQSSVKHEDF	401	415			-0.2978	-0.0418	-0.0604	-0.1247
	Rpt5	IALRNGQSSVKHEDFVEG	401	418		1.10851	1.71936	2.38704	2.91359	3.02342			IALRNGQSSVKHEDFVEG	401	418		1.1533	1.59556	2.42069	2.7654	2.88304			IALRNGQSSVKHEDFVEG	401	418		0.0448	-0.1238	0.0336	-0.1482	-0.1404			IALRNGQSSVKHEDFVEG	401	418		0.0448	-0.1238	0.0336	-0.1482	-0.1404
	Rpt5	FVEGISE	415	421		0.305717	0.465427	0.827613	1.41944	1.5265			FVEGISE	415	421		0.309722	0.414179	0.850795	1.46311	1.54088			FVEGISE	415	421		0.004	-0.0512	0.0232	0.0437	0.0144			FVEGISE	415	421		0.004	-0.0512	0.0232	0.0437	0.0144
	Protein	Sequence	Start	End		10 sec	1 min	10 min	1 hour	4 hours			Sequence	Start	End		10 sec	1 min	10 min	1 hour	4 hours
	Rpt6	ETHESGIKPYFEQKIQE	13	29		1.30478	1.95769	2.83675	3.85536	5.11727			ETHESGIKPYFEQKIQE	13	29		1.3822	2.03419	2.86331	3.93949	5.31767			ETHESGIKPYFEQKIQE	13	29		0.0774	0.0765	0.0266	0.0841	0.2004			ETHESGIKPYFEQKIQE	13	29		0.0774	0.0765	0.0266	0.0841	0.2004
	Rpt6	ETHESGIKPYFEQKIQETEL	13	32		1.54843	2.20367	3.15945	4.54725	6.194			ETHESGIKPYFEQKIQETEL	13	32		1.47622	2.13866	3.34852	4.5895	6.29238			ETHESGIKPYFEQKIQETEL	13	32		-0.0722	-0.065	0.1891	0.0423	0.0984			ETHESGIKPYFEQKIQETEL	13	32		-0.0722	-0.065	0.1891	0.0423	0.0984
	Rpt6	KIRSKTENVRRLEAQRNALNDKVRF	33	57		1.05813	2.0148	3.79215	5.68029	6.99915			KIRSKTENVRRLEAQRNALNDKVRF	33	57		1.1486	2.06805	3.84254	5.52477	6.89465			KIRSKTENVRRLEAQRNALNDKVRF	33	57		0.0905	0.0532	0.0504	-0.1555	-0.1045			KIRSKTENVRRLEAQRNALNDKVRF	33	57		0.0905	0.0532	0.0504	-0.1555	-0.1045
	Rpt6	KVRFIKDELRL	54	64		0.314012	0.407428	0.771463	1.52158	2.14406			KVRFIKDELRL	54	64		0.343236	0.402214	0.726578	1.30381	2.08413			KVRFIKDELRL	54	64		0.0292	-0.0052	-0.0449	-0.2178	-0.0599			KVRFIKDELRL	54	64		0.0292	-0.0052	-0.0449	-0.2178	-0.0599
	Rpt6	IKDELRL	58	64		0.112672	0.273109	0.585129	1.02115	1.33198			IKDELRL	58	64		0.142332	0.172534	0.53898	0.948554	1.42623			IKDELRL	58	64		0.0297	-0.1006	-0.0461	-0.0726	0.0942			IKDELRL	58	64		0.0297	-0.1006	-0.0461	-0.0726	0.0942
	Rpt6	LQEPGSY	65	71		0.493431	0.841032	1.18362	1.78886	1.90946			LQEPGSY	65	71		0.563006	0.902883	1.21219	1.86343	2.0167			LQEPGSY	65	71		0.0696	0.0619	0.0286	0.0746	0.1072			LQEPGSY	65	71		0.0696	0.0619	0.0286	0.0746	0.1072
	Rpt6	LQEPGSYVGE	65	74		0.703869	1.12647	1.47048	1.99712	2.47759			LQEPGSYVGE	65	74		0.680322	1.01845	1.37223	2.06573	2.3793			LQEPGSYVGE	65	74		-0.0235	-0.108	-0.0983	0.0686	-0.0983			LQEPGSYVGE	65	74		-0.0235	-0.108	-0.0983	0.0686	-0.0983
	Rpt6	VAKDINVKDLKASQ	98	111		3.57483	4.85853	6.06529	7.15116	7.65634			VAKDINVKDLKASQ	98	111		3.82809	4.81096	6.02283	7.14358	7.51781			VAKDINVKDLKASQ	98	111		0.2533	-0.0476	-0.0425	-0.0076	-0.1385			VAKDINVKDLKASQ	98	111		0.2533	-0.0476	-0.0425	-0.0076	-0.1385
	Rpt6	VAKDINVKDLKASQRVCL	98	115		3.60338	4.70547	6.25165	7.59732	8.01521			VAKDINVKDLKASQRVCL	98	115		3.7774	4.89708	6.07318	7.44608	7.82871			VAKDINVKDLKASQRVCL	98	115		0.174	0.1916	-0.1785	-0.1512	-0.1865			VAKDINVKDLKASQRVCL	98	115		0.174	0.1916	-0.1785	-0.1512	-0.1865
	Rpt6	RSDSYMLHKVLENKADPLVSL	116	136		6.13375	6.80246	7.18919	7.61644	8.09158			RSDSYMLHKVLENKADPLVSL	116	136		6.20597	6.92853	6.99997	7.6066	8.1598			RSDSYMLHKVLENKADPLVSL	116	136		0.0722	0.1261	-0.1892	-0.0098	0.0682			RSDSYMLHKVLENKADPLVSL	116	136		0.0722	0.1261	-0.1892	-0.0098	0.0682
	Rpt6	RSDSYMLHKVLENKADPLVSLM	116	137		6.81837	7.91751	7.93569	8.52098	9.15188			RSDSYMLHKVLENKADPLVSLM	116	137		7.20912	7.71939	8.10267	8.28991	9.12161			RSDSYMLHKVLENKADPLVSLM	116	137		0.3907	-0.1981	0.167	-0.2311	-0.0303			RSDSYMLHKVLENKADPLVSLM	116	137		0.3907	-0.1981	0.167	-0.2311	-0.0303
	Rpt6	YMLHKVLENKADPLVS	120	135		5.32111	5.84527	6.03185	6.04462	6.20876			YMLHKVLENKADPLVS	120	135		4.98942	5.75251	5.78702	6.08532	6.08407			YMLHKVLENKADPLVS	120	135		-0.3317	-0.0928	-0.2448	0.0407	-0.1247			YMLHKVLENKADPLVS	120	135		-0.3317	-0.0928	-0.2448	0.0407	-0.1247
	Rpt6	YMLHKVLENKADPLVSLM	120	137		6.48208	7.21394	7.41938	7.54038	8.0382			YMLHKVLENKADPLVSLM	120	137		6.55607	7.23869	7.27164	7.70932	7.94552			YMLHKVLENKADPLVSLM	120	137		0.074	0.0248	-0.1477	0.1689	-0.0927			YMLHKVLENKADPLVSLM	120	137		0.074	0.0248	-0.1477	0.1689	-0.0927
	Rpt6	MMVEKVPDSTY	137	147		4.09245	4.76533	5.17595	5.18114	5.04844			MMVEKVPDSTY	137	147		4.20103	4.77459	5.01029	5.25706	5.07051			MMVEKVPDSTY	137	147		0.1086	0.0093	-0.1657	0.0759	0.0221			MMVEKVPDSTY	137	147		0.1086	0.0093	-0.1657	0.0759	0.0221
	Rpt6	MMVEKVPDSTYDM	137	149		4.31192	5.07704	5.58074	5.83504	5.82212			MMVEKVPDSTYDM	137	149		4.32583	5.28028	5.56161	5.89292	5.65799			MMVEKVPDSTYDM	137	149		0.0139	0.2032	-0.0191	0.0579	-0.1641			MMVEKVPDSTYDM	137	149		0.0139	0.2032	-0.0191	0.0579	-0.1641
	Rpt6	MMVEKVPDSTYDMVGGLTKQIKEIKE	137	162		6.93715	8.6722	9.83347	10.7384	11.7337			MMVEKVPDSTYDMVGGLTKQIKEIKE	137	162		7.33131	8.62829	9.77254	10.9189	11.9026			MVEKVPDSTYDM	138	149		0.0297	0.1199	-0.1463	-0.1135	-0.0515			MVEKVPDSTYDM	138	149		0.0297	0.1199	-0.1463	-0.1135	-0.0515
	Rpt6	MVEKVPDSTYDM	138	149		3.67031	4.18826	4.85248	5.10228	4.98037			MVEKVPDSTYDM	138	149		3.70001	4.30817	4.7062	4.98882	4.92884			MMVEKVPDSTYDMVGGLTKQIKEIKE	137	162		0.3942	-0.0439	-0.0609	0.1806	0.1688			MMVEKVPDSTYDMVGGLTKQIKEIKE	137	162		0.3942	-0.0439	-0.0609	0.1806	0.1688
	Rpt6	MVEKVPDSTYDMVGGLTKQIKEIKE	138	162		6.1726	7.04801	8.09765	9.13153	10.274			MVEKVPDSTYDMVGGLTKQIKEIKE	138	162		6.20336	7.30676	7.97459	9.79539	11.0097			MVEKVPDSTYDMVGGLTKQIKEIKE	138	162		0.0308	0.2587	-0.1231	0.6639	0.7356			MVEKVPDSTYDMVGGLTKQIKEIKE	138	162		0.0308	0.2587	-0.1231	0.6639	0.7356
	Rpt6	VEKVPDSTYDMVGGLTKQIKEIKE	139	162		5.33244	6.51067	7.49946	8.47641	9.52847			VEKVPDSTYDMVGGLTKQIKEIKE	139	162		5.62864	6.75604	7.52617	8.63558	9.90691			VEKVPDSTYDMVGGLTKQIKEIKE	139	162		0.2962	0.2454	0.0267	0.1592	0.3784			VEKVPDSTYDMVGGLTKQIKEIKE	139	162		0.2962	0.2454	0.0267	0.1592	0.3784
	Rpt6	VGGLTKQIKEIKE	150	162		1.74419	2.28995	2.26177	2.66315	3.31566			VGGLTKQIKEIKE	150	162		2.07039	2.3503	2.33427	2.45018	3.15124			VGGLTKQIKEIKE	150	162		0.3262	0.0604	0.0725	-0.213	-0.1644			VGGLTKQIKEIKE	150	162		0.3262	0.0604	0.0725	-0.213	-0.1644
	Rpt6	FESLGIAQPKGVILYGPPGTGKTLL	174	198		4.49779	5.89879	7.76405	8.76106	9.31685			FESLGIAQPKGVILYGPPGTGKTLL	174	198		4.42366	5.85074	7.62713	8.97534	9.277			GIAQPKGVIL	178	187		0.0096	0.0456	-0.0433	-0.0224	0.1635			GIAQPKGVIL	178	187		0.0096	0.0456	-0.0433	-0.0224	0.1635
	Rpt6	GIAQPKGVIL	178	187		2.04464	2.43982	3.00561	3.21998	3.13302			GIAQPKGVIL	178	187		2.05421	2.48539	2.96229	3.19762	3.29657			FESLGIAQPKGVILYGPPGTGKTLL	174	198		-0.0741	-0.048	-0.1369	0.2143	-0.0398			FESLGIAQPKGVILYGPPGTGKTLL	174	198		-0.0741	-0.048	-0.1369	0.2143	-0.0398
	Rpt6	GIAQPKGVILYGPPGTGKTLL	178	198		2.94573	4.15997	5.6409	6.36701	6.95144			GIAQPKGVILYGPPGTGKTLL	178	198		3.17108	4.04475	5.43379	6.71706	7.17145			GIAQPKGVILYGPPGTGKTLL	178	198		0.2254	-0.1152	-0.2071	0.3501	0.22			GIAQPKGVILYGPPGTGKTLL	178	198		0.2254	-0.1152	-0.2071	0.3501	0.22
	Rpt6	IAQPKGVILYGPPGTGKTLL	179	198		2.24159	3.08717	4.34059	5.30163	6.22333			IAQPKGVILYGPPGTGKTLL	179	198		2.57751	3.64207	4.65551	5.82555	6.25281			IAQPKGVILYGPPGTGKTLL	179	198		0.3359	0.5549	0.3149	0.5239	0.0295			IAQPKGVILYGPPGTGKTLL	179	198		0.3359	0.5549	0.3149	0.5239	0.0295
	Rpt6	IRVSGAEL	211	218		1.6313	2.46778	3.03511	3.28089	3.38192			IRVSGAEL	211	218		1.75597	2.57954	2.94648	3.37771	3.46728			IRVSGAEL	211	218		0.1247	0.1118	-0.0886	0.0968	0.0854			IRVSGAEL	211	218		0.1247	0.1118	-0.0886	0.0968	0.0854
	Rpt6	VQKYIGEGSRM	219	229		4.32717	5.19057	5.46365	5.54638	5.22104			VQKYIGEGSRM	219	229		4.37672	5.17035	5.38325	5.56055	5.33559			VQKYIGEGSRM	219	229		0.0496	-0.0202	-0.0804	0.0142	0.1145			VQKYIGEGSRM	219	229		0.0496	-0.0202	-0.0804	0.0142	0.1145
	Rpt6	FVMAREHAPSIIF	234	246		0.574643	1.05285	1.96984	2.67818	2.81508			FVMAREHAPSIIF	234	246		0.574282	1.01996	1.97687	2.65591	2.87438			FVMAREHAPSIIF	234	246		-0.0004	-0.0329	0.007	-0.0223	0.0593			FVMAREHAPSIIF	234	246		-0.0004	-0.0329	0.007	-0.0223	0.0593
	Rpt6	VMAREHAPSIIFM	235	247		0.588407	0.922369	1.65349	2.2949	2.18573			VMAREHAPSIIFM	235	247		0.498011	0.845206	1.51162	2.15172	2.25601			VMAREHAPSIIFM	235	247		-0.0904	-0.0772	-0.1419	-0.1432	0.0703			VMAREHAPSIIFM	235	247		-0.0904	-0.0772	-0.1419	-0.1432	0.0703
	Rpt6	AREHAPSIIF	237	246		0.406699	0.581781	1.21695	1.3876	1.33376			AREHAPSIIF	237	246		0.377807	0.591381	1.21975	1.52853	1.44742			AREHAPSIIF	237	246		-0.0289	0.0096	0.0028	0.1409	0.1137			AREHAPSIIF	237	246		-0.0289	0.0096	0.0028	0.1409	0.1137
	Rpt6	AREHAPSIIFM	237	247		0.421887	0.558513	1.08212	1.32076	1.20152			AREHAPSIIFM	237	247		0.411259	0.724876	0.984583	1.2349	1.21098			AREHAPSIIFM	237	247		-0.0106	0.1664	-0.0975	-0.0859	0.0095			AREHAPSIIFM	237	247		-0.0106	0.1664	-0.0975	-0.0859	0.0095
	Rpt6	DEIDSIGSTRVEGSGGGDSEVQRTML	248	273		10.3831	11.4276	12.5784	13.4771	13.6924			DEIDSIGSTRVEGSGGGDSEVQRTML	248	273		10.3424	11.9279	12.5444	13.5828	13.8699			DEIDSIGSTRVEGSGGGDSEVQRTML	248	273		-0.0407	0.5002	-0.034	0.1058	0.1775			DEIDSIGSTRVEGSGGGDSEVQRTML	248	273		-0.0407	0.5002	-0.034	0.1058	0.1775
	Rpt6	RVEGSGGGDSEVQRTML	257	273		4.92334	5.64433	6.45703	6.96952	7.28731			RVEGSGGGDSEVQRTML	257	273		4.86958	5.65597	6.48152	7.16794	7.31766			RVEGSGGGDSEVQRTML	257	273		-0.0538	0.0116	0.0245	0.1984	0.0303			RVEGSGGGDSEVQRTML	257	273		-0.0538	0.0116	0.0245	0.1984	0.0303
	Rpt6	RVEGSGGGDSEVQRTMLEL	257	275		4.1138	4.99887	6.26318	6.89106	7.62033			RVEGSGGGDSEVQRTMLEL	257	275		3.89825	4.99298	5.88956	6.86369	7.80659			RVEGSGGGDSEVQRTMLEL	257	275		-0.2155	-0.0059	-0.3736	-0.0274	0.1863			RVEGSGGGDSEVQRTMLEL	257	275		-0.2155	-0.0059	-0.3736	-0.0274	0.1863
	Rpt6	ELLNQLDGFETSKNIKIIM	274	292		4.0279	4.59211	5.73636	7.27672	7.84279			ELLNQLDGFETSKNIKIIM	274	292		3.99038	4.38486	5.67376	7.2909	7.90467			ELLNQLDGFETSKNIKIIM	274	292		-0.0375	-0.2072	-0.0626	0.0142	0.0619			ELLNQLDGFETSKNIKIIM	274	292		-0.0375	-0.2072	-0.0626	0.0142	0.0619
	Rpt6	LNQLDGFETSKNIKIIM	276	292		3.5082	3.93104	5.03777	5.91913	6.3973			LNQLDGFETSKNIKIIM	276	292		3.48999	4.10904	4.74958	6.01386	6.41053			LNQLDGFETSKNIKIIM	276	292		-0.0182	0.178	-0.2882	0.0947	0.0132			LNQLDGFETSKNIKIIM	276	292		-0.0182	0.178	-0.2882	0.0947	0.0132
	Rpt6	FETSKNIKIIM	282	292		1.64816	1.83316	2.55337	3.00779	3.19689			FETSKNIKIIM	282	292		1.69647	1.83559	2.45898	3.05528	3.29002			FETSKNIKIIM	282	292		0.0483	0.0024	-0.0944	0.0475	0.0931			FETSKNIKIIM	282	292		0.0483	0.0024	-0.0944	0.0475	0.0931
	Rpt6	ATNRLDILDPAL	293	304		1.71808	2.49648	3.8161	4.19692	4.25528			ATNRLDILDPAL	293	304		1.72469	2.43354	3.64015	4.07552	4.30223			ATNRLDILDPAL	293	304		0.0066	-0.0629	-0.176	-0.1214	0.0469			ATNRLDILDPAL	293	304		0.0066	-0.0629	-0.176	-0.1214	0.0469
	Rpt6	DILDPAL	298	304		0.422272	0.692851	1.32773	1.63968	1.72536			DILDPAL	298	304		0.400216	0.669425	1.28822	1.63317	1.80073			DILDPAL	298	304		-0.0221	-0.0234	-0.0395	-0.0065	0.0754			DILDPAL	298	304		-0.0221	-0.0234	-0.0395	-0.0065	0.0754
	Rpt6	LRPGRIDRKIEFPPPSVA	305	322		3.90979	4.35471	5.57824	6.03054	6.03614			LRPGRIDRKIEFPPPSVA	305	322		3.86392	4.25378	5.30276	6.12924	6.01374			LRPGRIDRKIEFPPPSVA	305	322		-0.0459	-0.1009	-0.2755	0.0987	-0.0224			LRPGRIDRKIEFPPPSVA	305	322		-0.0459	-0.1009	-0.2755	0.0987	-0.0224
	Rpt6	LRIHSRKMNLTRGINL	328	343		3.81529	4.50438	5.3666	5.63658	5.51999			LRIHSRKMNLTRGINL	328	343		3.91126	4.59201	5.3109	5.77342	5.53851			LRIHSRKMNLTRGINL	328	343		0.096	0.0876	-0.0557	0.1368	0.0185			LRIHSRKMNLTRGINL	328	343		0.096	0.0876	-0.0557	0.1368	0.0185
	Rpt6	LRKVAEKMNGCSGADVKGVCTE	343	364		2.99735	4.63148	7.33877	9.39632	9.82186			LRKVAEKMNGCSGADVKGVCTE	343	364		3.15898	4.68833	7.10279	9.34667	9.57668			LRKVAEKMNGCSGADVKGVCTE	343	364		0.1616	0.0568	-0.236	-0.0497	-0.2452			LRKVAEKMNGCSGADVKGVCTE	343	364		0.1616	0.0568	-0.236	-0.0497	-0.2452
	Rpt6	RKVAEKMNGCSGADVKGVCTE	344	364		2.73512	4.12827	6.7684	8.71582	9.38138			RKVAEKMNGCSGADVKGVCTE	344	364		2.92509	4.28367	6.78672	8.69573	9.25969			RKVAEKMNGCSGADVKGVCTE	344	364		0.19	0.1554	0.0183	-0.0201	-0.1217			RKVAEKMNGCSGADVKGVCTE	344	364		0.19	0.1554	0.0183	-0.0201	-0.1217
	Rpt6	YALRERRIHVTQED	368	381		1.33343	2.26051	2.88628	3.13167	3.35372			YALRERRIHVTQED	368	381		1.70159	2.32472	2.77209	3.16831	3.46542			YALRERRIHVTQED	368	381		0.3682	0.0642	-0.1142	0.0366	0.1117			YALRERRIHVTQED	368	381		0.3682	0.0642	-0.1142	0.0366	0.1117
	Rpt6	YALRERRIHVTQEDFE	368	383		1.84642	2.30546	2.93757	3.45701	3.58209			YALRERRIHVTQEDFE	368	383		1.82559	2.53596	3.04689	3.35993	3.66439			YALRERRIHVTQEDFE	368	383		-0.0208	0.2305	0.1093	-0.0971	0.0823			YALRERRIHVTQEDFE	368	383		-0.0208	0.2305	0.1093	-0.0971	0.0823
	Rpt6	FELAVGKVMNKNQETA	382	397		4.43009	5.35135	6.88633	7.25515	7.26432			FELAVGKVMNKNQETA	382	397		4.54795	5.30369	6.87665	7.06685	7.15184			FELAVGKVMNKNQETA	382	397		0.1179	-0.0477	-0.0097	-0.1883	-0.1125			FELAVGKVMNKNQETA	382	397		0.1179	-0.0477	-0.0097	-0.1883	-0.1125
	Rpt6	FELAVGKVMNKNQETAIS	382	399		6.09405	7.00162	8.46707	8.94816	9.00973			FELAVGKVMNKNQETAIS	382	399		6.04931	7.20853	8.2957	8.88283	8.97386			FELAVGKVMNKNQETAIS	382	399		-0.0447	0.2069	-0.1714	-0.0653	-0.0359			FELAVGKVMNKNQETAIS	382	399		-0.0447	0.2069	-0.1714	-0.0653	-0.0359
	Rpt6	FELAVGKVMNKNQETAISV	382	400		7.00773	7.73636	9.30172	9.78411	9.40234			FELAVGKVMNKNQETAISV	382	400		6.92711	7.87567	9.02576	9.72595	9.57562			FELAVGKVMNKNQETAISV	382	400		-0.0806	0.1393	-0.276	-0.0582	0.1733			FELAVGKVMNKNQETAISV	382	400		-0.0806	0.1393	-0.276	-0.0582	0.1733
	Rpt6	LAVGKVMNKNQETAISV	384	400		6.76633	7.45078	8.79898	9.23889	9.17048			LAVGKVMNKNQETAISV	384	400		6.85456	7.6607	8.90496	9.32814	8.98204			LAVGKVMNKNQETAISV	384	400		0.0882	0.2099	0.106	0.0892	-0.1884			LAVGKVMNKNQETAISV	384	400		0.0882	0.2099	0.106	0.0892	-0.1884
	Rpt6	LAVGKVMNKNQETAISVAKLFK	384	405		11.6233	12.1697	13.522	13.8866	13.7004			LAVGKVMNKNQETAISVAKLFK	384	405		11.6952	12.3599	13.411	13.7999	13.7787			AVGKVMNKNQETAISV	385	400		-0.2399	-0.1939	-0.3141	-0.1433	-0.4423			AVGKVMNKNQETAISV	385	400		-0.2399	-0.1939	-0.3141	-0.1433	-0.4423
	Rpt6	AVGKVMNKNQETAISV	385	400		6.93141	7.63041	8.85736	9.23136	9.15213			AVGKVMNKNQETAISV	385	400		6.69155	7.43654	8.54323	9.08807	8.70983			LAVGKVMNKNQETAISVAKLFK	384	405		0.0719	0.1902	-0.111	-0.0867	0.0783			LAVGKVMNKNQETAISVAKLFK	384	405		0.0719	0.1902	-0.111	-0.0867	0.0783

## Sheet: Suppl.Fig.5b
	Deuterium incorporation in Da for all peptides																																	Relative uptake difference in Da for all peptides
					Ubp6 replicate 1											Ubp6-UbVMe replicate 1											Ubp6-UbVMe+base replicate 1											D(Ubp6-UbVMe) - D(Ubp6) Replicate 1						D(Ubp6-UbVMe) - D(Ubp6) Replicate 1
	Sequence	Start	End		10 sec	1 min	10 min	1 hour	4 hours			Sequence	Start	End		10 sec	1 min	10 min	1 hour	4 hours			Sequence	Start	End		10 sec	1 min	10 min	1 hour	4 hours			Sequence	Start	End		10 sec	1 min	10 min	1 hour	4 hours		10 sec	1 min	10 min	1 hour	4 hours
	FNIRHSGKVYPITL	8	21		1.01642	1.92596	3.88897	5.31801	5.70629			FNIRHSGKVYPITL	8	21		0.991118	1.91506	3.80114	5.13999	5.34682			FNIRHSGKVYPITL	8	21		0.841757	1.29986	1.68161	2.06605	2.37564			FNIRHSGKVYPITL	8	21		-0.0253	-0.0109	-0.0878	-0.178	-0.3595		-0.0253	-0.0109	-0.0878	-0.178	-0.3595
	NIRHSGKVYPITL	9	21		1.06822	1.92721	3.61487	4.89469	5.06007			NIRHSGKVYPITL	9	21		1.05208	2.00365	3.63245	4.82409	4.97818			NIRHSGKVYPITL	9	21		0.993876	1.41201	1.85051	2.1013	2.35711			NIRHSGKVYPITL	9	21		-0.0161	0.0764	0.0176	-0.0706	-0.0819		-0.0161	0.0764	0.0176	-0.0706	-0.0819
	LSTDATSADLKSKAEE	21	36		2.23436	3.51531	6.72761	8.72512	8.92278			LSTDATSADLKSKAEE	21	36		2.28536	3.49306	7.13527	8.72537	9.0517			LSTDATSADLKSKAEE	21	36		2.0271	2.65152	3.96049	5.11637	6.00263			LSTDATSADLKSKAEE	21	36		0.051	-0.0223	0.4077	0.0003	0.1289		0.051	-0.0223	0.4077	0.0003	0.1289
	STDATSADL	22	30		1.72661	2.3652	3.62627	4.32783	4.22126			STDATSADL	22	30		1.71036	2.29081	3.63253	4.28397	4.41148			STDATSADL	22	30		1.44859	1.85799	2.46247	2.82835	3.31095			STDATSADL	22	30		-0.0163	-0.0744	0.0063	-0.0439	0.1902		-0.0163	-0.0744	0.0063	-0.0439	0.1902
	STDATSADLKSKAEE	22	36		1.94282	3.14911	6.38647	8.37907	8.43871			STDATSADLKSKAEE	22	36		2.33839	3.0885	6.736	8.36612	8.39414			STDATSADLKSKAEE	22	36		1.8385	2.27887	3.69544	4.40809	5.69566			STDATSADLKSKAEE	22	36		0.3956	-0.0606	0.3495	-0.0129	-0.0446		0.3956	-0.0606	0.3495	-0.0129	-0.0446
	STDATSADLKSKAEEL	22	37		1.76726	2.6376	6.33	8.81963	8.93178			STDATSADLKSKAEEL	22	37		1.86033	2.8254	6.62501	8.84247	9.13779			STDATSADLKSKAEEL	22	37		1.65427	2.08157	3.71892	5.13403	6.19036			STDATSADLKSKAEEL	22	37		0.0931	0.1878	0.295	0.0228	0.206		0.0931	0.1878	0.295	0.0228	0.206
	SIKIYPLIKPGST	58	70		2.59349	4.08639	5.22835	6.38142	6.50641			SIKIYPLIKPGST	58	70		2.64365	4.0927	5.17996	6.32257	6.57738			SIKIYPLIKPGST	58	70		2.25552	3.37623	4.04803	4.70268	5.56986			SIKIYPLIKPGST	58	70		0.0502	0.0063	-0.0484	-0.0588	0.071		0.0502	0.0063	-0.0484	-0.0588	0.071
	SIKIYPLIKPGSTVML	58	73		2.80128	4.58772	6.54066	8.42201	8.6386			SIKIYPLIKPGSTVML	58	73		2.73543	4.69739	6.59632	8.26834	8.53974			SIKIYPLIKPGSTVML	58	73		2.10419	3.29025	4.31548	5.1172	6.1795			SIKIYPLIKPGSTVML	58	73		-0.0658	0.1097	0.0557	-0.1537	-0.0989		-0.0658	0.1097	0.0557	-0.1537	-0.0989
	IKIYPLIKPGST	59	70		2.0394	3.29212	4.39266	5.45904	5.78412			IKIYPLIKPGST	59	70		2.02955	3.35026	4.32468	5.48733	5.73615			IKIYPLIKPGST	59	70		1.5718	2.55817	3.15258	3.96101	4.85313			IKIYPLIKPGST	59	70		-0.0099	0.0581	-0.068	0.0283	-0.048		-0.0099	0.0581	-0.068	0.0283	-0.048
	IKIYPLIKPGSTVML	59	73		2.04913	3.79418	5.57812	7.27144	7.61832			IKIYPLIKPGSTVML	59	73		2.06024	3.78047	5.51792	7.10175	7.34162			IKIYPLIKPGSTVML	59	73		1.49127	2.42461	3.39318	4.23605	5.12281			IKIYPLIKPGSTVML	59	73		0.0111	-0.0137	-0.0602	-0.1697	-0.2767		0.0111	-0.0137	-0.0602	-0.1697	-0.2767
	VMLLGTPDANL	71	81		2.95914	3.15386	3.7197	4.22954	4.24357			VMLLGTPDANL	71	81		2.92315	3.02913	3.49573	4.09752	4.13439			VMLLGTPDANL	71	81		1.43254	2.06852	2.785	2.98728	2.97898			VMLLGTPDANL	71	81		-0.036	-0.1247	-0.224	-0.132	-0.1092		-0.036	-0.1247	-0.224	-0.132	-0.1092
	LGTPDANL	74	81		3.25104	3.26293	3.3636	3.27874	3.19663			LGTPDANL	74	81		3.24155	3.24529	3.08917	3.26477	3.26866			LGTPDANL	74	81		1.77266	2.53513	3.26249	3.26228	3.16255			LGTPDANL	74	81		-0.0095	-0.0176	-0.2744	-0.014	0.072		-0.0095	-0.0176	-0.2744	-0.014	0.072
	ISKPAKKNNF	82	91		4.73828	4.75762	4.88366	4.59458	4.8462			ISKPAKKNNF	82	91		4.77924	4.67325	4.67492	4.81611	n/a			ISKPAKKNNF	82	91		n/a	n/a	4.80429	4.5903	4.57798			ISKPAKKNNF	82	91		0.041	-0.0844	-0.2087	0.2215	n/a		0.041	-0.0844	-0.2087	0.2215
	ISKPAKKNNFIEDLAPEQQVQQ	82	103		10.8057	10.6238	10.7482	10.4664	10.5473			ISKPAKKNNFIEDLAPEQQVQQ	82	103		10.178	10.3984	10.105	10.1183	10.3097			ISKPAKKNNFIEDLAPEQQVQQ	82	103		9.4202	10.2758	10.8148	10.4517	10.3315			ISKPAKKNNFIEDLAPEQQVQQ	82	103		-0.6277	-0.2254	-0.6433	-0.3481	-0.2376		-0.6277	-0.2254	-0.6433	-0.3481	-0.2376
	IEDLAPEQQVQQ	92	103		5.59742	5.66556	5.75616	5.58233	5.56163			IEDLAPEQQVQQ	92	103		5.38071	5.43755	5.28197	5.42312	5.46682			IEDLAPEQQVQQ	92	103		5.03523	5.36008	5.61824	5.56756	5.45522			IEDLAPEQQVQQ	92	103		-0.2167	-0.228	-0.4742	-0.1592	-0.0948		-0.2167	-0.228	-0.4742	-0.1592	-0.0948
	IEDLAPEQQVQQF	92	104		6.23294	6.29883	6.34121	6.19146	6.18113			IEDLAPEQQVQQF	92	104		6.11591	6.0838	6.03332	6.14627	6.22945			IEDLAPEQQVQQF	92	104		5.71695	6.01117	6.20071	6.21967	6.0276			IEDLAPEQQVQQF	92	104		-0.117	-0.215	-0.3079	-0.0452	0.0483		-0.117	-0.215	-0.3079	-0.0452	0.0483
	IEDLAPEQQVQQFAQL	92	107		8.62656	8.68474	8.75553	8.60413	8.52783			IEDLAPEQQVQQFAQL	92	107		8.49789	8.45933	8.45031	8.42512	8.65729			IEDLAPEQQVQQFAQL	92	107		8.13945	8.57236	8.85547	8.57524	8.75729			IEDLAPEQQVQQFAQL	92	107		-0.1287	-0.2254	-0.3052	-0.179	0.1295		-0.1287	-0.2254	-0.3052	-0.179	0.1295
	PVGFKNMGNTCYL	108	120		1.88135	2.95083	4.38212	5.98137	6.33045			QALYRVNDLRD	125	135		1.33596	1.36686	1.72985	2.28813	2.59349			QALYRVNDLRD	125	135		1.28057	1.34864	1.85165	2.2806	2.58104			QALYRVNDLRD	125	135		0.0762	0.0545	0.0086	0.1549			0.0762	0.0545	0.0086	0.1549
	QALYRVNDLRD	125	135		1.25978	1.3124	1.72124	2.13326	n/a			MKRCFENLQNKSFKSVL	163	179		4.35445	n/a	5.6164	6.09324	6.59907			MKRCFENLQNKSFKSVL	163	179		4.4333	5.12382	5.86097	6.30745	6.31274			MKRCFENLQNKSFKSVL	163	179		n/a	n/a	n/a	n/a	n/a
	KSVLPIVL	176	183		2.6051	3.64378	4.11266	4.08753	4.05825			KSVLPIVL	176	183		2.58535	3.4956	3.80929	3.9936	3.95603			KSVLPIVL	176	183		2.5039	3.37658	3.9554	3.99454	3.89661			KSVLPIVL	176	183		-0.0198	-0.1482	-0.3034	-0.0939	-0.1022		-0.0198	-0.1482	-0.3034	-0.0939	-0.1022
	LNTLRKCYPQF	184	194		1.0452	1.46235	1.69491	2.33059	3.59594			LNTLRKCYPQF	184	194		0.872645	0.953778	0.960087	1.20552	1.78883			LNTLRKCYPQF	184	194		0.882383	0.978271	1.0248	1.29536	1.83972			LNTLRKCYPQF	184	194		-0.1726	-0.5086	-0.7348	-1.1251	-1.8071		-0.1726	-0.5086	-0.7348	-1.1251	-1.8071
	NTLRKCYPQF	185	194		1.10654	1.44022	1.73846	2.33494	3.48728			NTLRKCYPQF	185	194		0.940151	0.948756	1.0191	1.19804	1.71439			NTLRKCYPQF	185	194		0.88535	0.957977	0.898632	1.1963	1.6909			NTLRKCYPQF	185	194		-0.1664	-0.4915	-0.7194	-1.1369	-1.7729		-0.1664	-0.4915	-0.7194	-1.1369	-1.7729
	AERDSQGGF	195	203		3.59883	3.72114	3.72455	3.67634	3.56676			AERDSQGGF	195	203		3.58432	3.61542	3.42884	3.59107	3.72431			AERDSQGGF	195	203		3.56004	3.54048	3.6843	3.57084	3.52131			AERDSQGGF	195	203		-0.0145	-0.1057	-0.2957	-0.0853	0.1576		-0.0145	-0.1057	-0.2957	-0.0853	0.1576
	YKQQDAEELF	204	213		0.980984	1.80709	2.5918	3.75884	4.7911			YKQQDAEELF	204	213		1.16008	1.33375	1.1625	1.28182	1.18974			YKQQDAEELF	204	213		n/a	n/a	n/a	n/a	n/a			YKQQDAEELF	204	213		0.1791	-0.4733	-1.4293	-2.477	-3.6014		0.1791	-0.4733	-1.4293	-2.477	-3.6014
	FTQLFHSM	213	220		0.301774	0.468271	0.417331	0.493414	0.733028			FTQLFHSM	213	220		0.410476	0.436224	0.404665	0.391614	0.444598			FTQLFHSM	213	220		0.456698	0.423432	0.438538	0.453755	0.404111			FTQLFHSM	213	220		0.1087	-0.032	-0.0127	-0.1018	-0.2884		0.1087	-0.032	-0.0127	-0.1018	-0.2884
	FTQLFHSMS	213	221		0.47368	0.496183	0.49311	0.636477	n/a			FTQLFHSMS	213	221		0.376058	0.502701	0.444359	0.377844	0.486814			FTQLFHSMS	213	221		0.510326	n/a	0.337575	0.069773	0.093691			FTQLFHSMS	213	221		-0.0976	0.0065	-0.0488	-0.2586	n/a		-0.0976	0.0065	-0.0488	-0.2586
	FHSMSIVF	217	224		0.181145	0.154659	0.161459	0.210431	0.437589			FHSMSIVF	217	224		0.218628	0.323761	0.27361	0.259169	0.21842			FHSMSIVF	217	224		0.162993	0.195625	0.135294	0.203311	0.267305			FHSMSIVF	217	224		0.0375	0.1691	0.1122	0.0487	-0.2192		0.0375	0.1691	0.1122	0.0487	-0.2192
	FHSMSIVFGDKFSED	217	231		1.2874	2.09046	3.31298	3.40693	3.43749			FHSMSIVFGDKFSED	217	231		1.13073	1.76753	2.15798	3.13358	3.32092			FHSMSIVFGDKFSED	217	231		1.61658	1.91421	2.75812	3.70236	3.70973			FHSMSIVFGDKFSED	217	231		-0.1567	-0.3229	-1.155	-0.2734	-0.1166		-0.1567	-0.3229	-1.155	-0.2734	-0.1166
	SIVFGDKF	221	228		1.22978	1.59373	1.91134	2.00875	2.28141			SIVFGDKF	221	228		0.999777	1.3854	1.77111	2.01911	2.30761			SIVFGDKF	221	228		0.960784	1.26239	1.65616	1.9363	2.29694			SIVFGDKF	221	228		-0.23	-0.2083	-0.1402	0.0104	0.0262		-0.23	-0.2083	-0.1402	0.0104	0.0262
	SIVFGDKFSEDF	221	232		1.44449	2.31643	3.22743	3.64932	3.85041			SIVFGDKFSEDF	221	232		1.25628	1.82251	2.43854	3.229	3.60615			SIVFGDKFSEDF	221	232		1.3285	1.78963	2.81032	3.46573	3.70458			SIVFGDKFSEDF	221	232		-0.1882	-0.4939	-0.7889	-0.4203	-0.2443		-0.1882	-0.4939	-0.7889	-0.4203	-0.2443
	IVFGDKFSED	222	231		1.46566	2.23142	3.22615	3.49862	3.74838			IVFGDKFSED	222	231		1.17084	1.75599	2.51046	3.10388	3.53671			IVFGDKFSED	222	231		1.46119	1.81663	2.76981	3.44579	3.74073			IVFGDKFSED	222	231		-0.2948	-0.4754	-0.7157	-0.3947	-0.2117		-0.2948	-0.4754	-0.7157	-0.3947	-0.2117
	IVFGDKFSEDF	222	232		1.39986	2.14326	3.10166	3.32058	3.654			IVFGDKFSEDF	222	232		1.17084	1.69116	2.38823	3.08431	3.4482			IVFGDKFSEDF	222	232		1.21455	1.72564	2.70873	3.24162	3.54495			IVFGDKFSEDF	222	232		-0.229	-0.4521	-0.7134	-0.2363	-0.2058		-0.229	-0.4521	-0.7134	-0.2363	-0.2058
	KTTIKDTANDNDITVKENESDSKLQC	237	262		5.17856	7.82346	10.8475	11.9738	13.1954			KTTIKDTANDNDITVKENESDSKLQC	237	262		4.31927	6.39382	8.46657	9.43984	10.5719			KTTIKDTANDNDITVKENESDSKLQC	237	262		4.41727	6.19556	8.44309	9.33693	10.2135			KTTIKDTANDNDITVKENESDSKLQC	237	262		-0.8593	-1.4296	-2.381	-2.5339	-2.6236		-0.8593	-1.4296	-2.381	-2.5339	-2.6236
	ITVKENESDSKL	249	260		2.94902	3.81711	4.2941	4.72552	5.1779			ITVKENESDSKL	249	260		2.34284	3.27068	3.47423	3.88745	4.51231			ITVKENESDSKL	249	260		2.36943	3.15757	3.56283	3.91241	4.39248			ITVKENESDSKL	249	260		-0.6062	-0.5464	-0.8199	-0.8381	-0.6656		-0.6062	-0.5464	-0.8199	-0.8381	-0.6656
	ITVKENESDSKLQC	249	262		3.11803	4.17738	5.22874	5.62002	6.08025			ITVKENESDSKLQC	249	262		2.65889	3.88705	4.33145	4.72433	5.46483			ITVKENESDSKLQC	249	262		2.8125	3.75738	4.45522	4.73572	5.22401			ITVKENESDSKLQC	249	262		-0.4591	-0.2903	-0.8973	-0.8957	-0.6154		-0.4591	-0.2903	-0.8973	-0.8957	-0.6154
	QCHISGTTNF	261	270		3.77906	4.19371	4.53479	4.27009	4.4372			QCHISGTTNF	261	270		3.58169	3.85899	4.04124	4.19512	4.28486			QCHISGTTNF	261	270		2.69725	3.05388	3.52509	4.0764	4.17006			QCHISGTTNF	261	270		-0.1974	-0.3347	-0.4935	-0.075	-0.1523		-0.1974	-0.3347	-0.4935	-0.075	-0.1523
	HISGTTNF	263	270		3.22763	3.3076	3.38572	3.29821	3.25224			HISGTTNF	263	270		3.16551	3.20907	3.08726	3.15814	3.25938			HISGTTNF	263	270		2.29353	2.49965	2.95935	3.20513	3.21883			HISGTTNF	263	270		-0.0621	-0.0985	-0.2985	-0.1401	0.0071		-0.0621	-0.0985	-0.2985	-0.1401	0.0071
	MRNGLLEGLN	271	280		1.07331	1.61302	2.81177	3.99132	4.49252			MRNGLLEGLN	271	280		0.737397	1.25736	2.20784	3.17481	3.98892			MRNGLLEGLN	271	280		0.794117	1.10403	2.08493	3.45523	3.79661			MRNGLLEGLN	271	280		-0.3359	-0.3557	-0.6039	-0.8165	-0.5036		-0.3359	-0.3557	-0.6039	-0.8165	-0.5036
	MRNGLLEGLNE	271	281		0.745846	1.28776	2.29475	3.29883	3.66542			MRNGLLEGLNE	271	281		0.790524	1.29699	2.02273	2.85496	3.48169			MRNGLLEGLNE	271	281		0.705449	0.870715	1.70821	2.75382	3.31641			MRNGLLEGLNE	271	281		0.0447	0.0092	-0.272	-0.4439	-0.1837		0.0447	0.0092	-0.272	-0.4439	-0.1837
	NEKIEKRSDLTGANSIY	280	296		5.07361	6.53586	7.87841	8.61243	8.78729			NEKIEKRSDLTGANSIY	280	296		3.03645	4.80006	5.61488	6.36967	6.82004			NEKIEKRSDLTGANSIY	280	296		3.08303	4.27819	6.12148	6.32103	6.60825			NEKIEKRSDLTGANSIY	280	296		-2.0372	-1.7358	-2.2635	-2.2428	-1.9672		-2.0372	-1.7358	-2.2635	-2.2428	-1.9672
	NEKIEKRSDLTGANSIYS	280	297		5.31339	7.06438	8.28152	9.61311	9.90627			NEKIEKRSDLTGANSIYS	280	297		3.23979	5.05281	6.00044	6.8386	7.32387			NEKIEKRSDLTGANSIYS	280	297		3.22807	4.40141	5.70282	n/a	7.0208			NEKIEKRSDLTGANSIYS	280	297		-2.0736	-2.0116	-2.2811	-2.7745	-2.5824		-2.0736	-2.0116	-2.2811	-2.7745	-2.5824
	EKIEKRSDLTGANSIY	281	296		4.6004	6.07599	7.28253	7.87339	8.18049			EKIEKRSDLTGANSIY	281	296		2.83554	4.18416	5.21325	5.89371	6.34149			EKIEKRSDLTGANSIY	281	296		2.847	3.90159	5.2795	5.79326	6.06946			EKIEKRSDLTGANSIY	281	296		-1.7649	-1.8918	-2.0693	-1.9797	-1.839		-1.7649	-1.8918	-2.0693	-1.9797	-1.839
	VEKKISRLPKF	298	308		0.444166	0.418821	0.385154	0.60672	0.636609			VEKKISRLPKF	298	308		0.400649	n/a	0.440497	0.470572	0.499332			VEKKISRLPKF	298	308		0.138603	0.261208	0.085768	0.321669	0.401486			VEKKISRLPKF	298	308		-0.0435	n/a	0.0553	-0.1361	-0.1373		-0.0435		0.0553	-0.1361	-0.1373
	DVADMLTPEYAAE	339	351		1.80403	2.44922	3.04133	3.62133	4.29515			DVADMLTPEYAAE	339	351		1.8145	2.39084	2.97559	3.69441	4.21476			DVADMLTPEYAAE	339	351		1.57895	2.24807	3.03962	3.68568	4.02768			DVADMLTPEYAAE	339	351		0.0105	-0.0584	-0.0657	0.0731	-0.0804		0.0105	-0.0584	-0.0657	0.0731	-0.0804
	DVADMLTPEYAAEKVKVRDEL	339	359		2.26733	3.14097	4.53564	6.10903	8.31208			DVADMLTPEYAAEKVKVRDEL	339	359		2.32702	3.00761	4.58511	6.30589	8.08651			DVADMLTPEYAAEKVKVRDEL	339	359		2.21068	2.9664	4.27927	6.39015	7.72741			DVADMLTPEYAAEKVKVRDEL	339	359		0.0597	-0.1334	0.0495	0.1969	-0.2256		0.0597	-0.1334	0.0495	0.1969	-0.2256
	MLTPEYAAEKVKVRDEL	343	359		1.28999	2.0373	3.134	4.88753	6.02225			MLTPEYAAEKVKVRDEL	343	359		1.48843	2.10411	3.30143	4.56108	6.10061			MLTPEYAAEKVKVRDEL	343	359		1.32196	2.1867	3.29583	4.76797	5.83302			MLTPEYAAEKVKVRDEL	343	359		0.1984	0.0668	0.1674	-0.3265	0.0784		0.1984	0.0668	0.1674	-0.3265	0.0784
	LTPEYAAEKVKVRDEL	344	359		1.26624	2.06526	3.23103	4.61433	5.97049			LTPEYAAEKVKVRDEL	344	359		1.33788	2.04333	3.15084	4.43582	5.74088			LTPEYAAEKVKVRDEL	344	359		1.14571	1.87915	3.18722	4.54001	5.58651			LTPEYAAEKVKVRDEL	344	359		0.0716	-0.0219	-0.0802	-0.1785	-0.2296		0.0716	-0.0219	-0.0802	-0.1785	-0.2296
	AAEKVKVRDEL	349	359		0.635856	0.790187	1.37423	2.25577	3.35293			AAEKVKVRDEL	349	359		0.534963	0.698044	1.31664	2.24976	3.29913			AAEKVKVRDEL	349	359		0.511915	0.664551	1.33168	2.37041	3.25947			AAEKVKVRDEL	349	359		-0.1009	-0.0921	-0.0576	-0.006	-0.0538		-0.1009	-0.0921	-0.0576	-0.006	-0.0538
	NVMTPREQYETQ	385	396		6.53202	6.51467	6.64973	6.45295	6.48599			NVMTPREQYETQ	385	396		6.40143	6.40217	6.30943	6.40674	6.51224			NVMTPREQYETQ	385	396		6.62432	6.41623	6.5843	6.44083	6.40448			NVMTPREQYETQ	385	396		-0.1306	-0.1125	-0.3403	-0.0462	0.0263		-0.1306	-0.1125	-0.3403	-0.0462	0.0263
	VMTPREQYETQ	386	396		6.05281	6.17193	5.94923	5.88071	6.15944			VMTPREQYETQ	386	396		6.07611	5.99111	5.96483	6.12433	5.99297			VMTPREQYETQ	386	396		5.9011	6.01392	6.23625	n/a	5.98888			VMTPREQYETQ	386	396		0.0233	-0.1808	0.0156	0.2436	-0.1665		0.0233	-0.1808	0.0156	0.2436	-0.1665
	QVALNES	396	402		0.336499	0.303572	0.286656	0.324052	0.322273			QVALNES	396	402		0.323021	0.350695	0.42856	0.418741	0.368228			QVALNES	396	402		0.305459	0.312068	0.28564	0.329763	0.323329			QVALNES	396	402		-0.0135	0.0471	0.1419	0.0947	0.046		-0.0135	0.0471	0.1419	0.0947	0.046
	VALNESEKDQW	397	407		5.73115	5.91239	5.85746	5.73849	5.77325			VALNESEKDQW	397	407		5.63018	5.83942	5.80337	5.75468	5.86225			VALNESEKDQW	397	407		6.03734	6.0148	6.0823	5.93585	5.97429			VALNESEKDQW	397	407		-0.101	-0.073	-0.0541	0.0162	0.089		-0.101	-0.073	-0.0541	0.0162	0.089
	VALNESEKDQWL	397	408		5.68655	6.147	6.29603	6.01724	6.15806			VALNESEKDQWL	397	408		5.50281	5.9901	5.89482	5.91551	5.93534			VALNESEKDQWL	397	408		5.77432	5.97458	6.21799	5.80763	5.73385			VALNESEKDQWL	397	408		-0.1837	-0.1569	-0.4012	-0.1017	-0.2227		-0.1837	-0.1569	-0.4012	-0.1017	-0.2227
	VALNESEKDQWLEE	397	410		6.145	6.81073	7.08499	6.88578	6.8051			VALNESEKDQWLEE	397	410		5.73668	6.71102	6.79265	6.76868	6.85847			VALNESEKDQWLEE	397	410		6.23895	6.84532	7.08174	6.9369	6.81968			VALNESEKDQWLEE	397	410		-0.4083	-0.0997	-0.2923	-0.1171	0.0534		-0.4083	-0.0997	-0.2923	-0.1171	0.0534
	VALNESEKDQWLEEYKKHFPPNL	397	419		7.36066	9.51148	11.4594	12.3013	12.4159			VALNESEKDQWLEEYKKHFPPNL	397	419		6.75474	9.07738	10.9094	11.7864	11.9438			VALNESEKDQWLEEYKKHFPPNL	397	419		7.24014	9.05165	11.3863	11.9106	11.8493			VALNESEKDQWLEEYKKHFPPNL	397	419		-0.6059	-0.4341	-0.5501	-0.5149	-0.4721		-0.6059	-0.4341	-0.5501	-0.5149	-0.4721
	NESEKDQWLEE	400	410		3.72064	4.5471	4.81649	4.69116	4.62655			NESEKDQWLEE	400	410		3.6552	4.54318	4.53051	4.65549	4.69199			NESEKDQWLEE	400	410		4.03895	4.6596	4.80961	4.65229	4.71069			NESEKDQWLEE	400	410		-0.0654	-0.0039	-0.286	-0.0357	0.0654		-0.0654	-0.0039	-0.286	-0.0357	0.0654
	EKGENPSCVYNL	420	431		0.983847	1.04738	0.969482	1.46347	1.62233			EKGENPSCVYNL	420	431		0.978773	1.05042	1.0754	1.40286	1.56029			EKGENPSCVYNLIG	420	433		0.810994	0.882042	0.8043	1.24905	1.47119			EKGENPSCVYNL	420	431		-0.0051	0.003	0.1059	-0.0606	-0.062		-0.0051	0.003	0.1059	-0.0606	-0.062
	EKGENPSCVYNLIG	420	433		0.951409	0.966195	0.90111	1.39235	1.71029			EKGENPSCVYNLIG	420	433		0.939266	1.08269	1.06046	1.37502	1.51863			EKGENPSCVYNLIG	420	433		n/a	n/a	n/a	n/a	n/a			EKGENPSCVYNLIG	420	433		-0.0121	0.1165	0.1593	-0.0173	-0.1917		-0.0121	0.1165	0.1593	-0.0173	-0.1917
	YNLIGVITHQGANSESGHYQAF	429	450		3.37174	3.85964	4.4233	4.49773	5.01001			YNLIGVITHQGANSESGHYQAF	429	450		2.53942	3.09379	3.01679	3.43592	3.73151			YNLIGVITHQGANSESGHYQAF	429	450		n/a	n/a	n/a	n/a	n/a			YNLIGVITHQGANSESGHYQAF	429	450		-0.8323	-0.7658	-1.4065	-1.0618	-1.2785		-0.8323	-0.7658	-1.4065	-1.0618	-1.2785
	IGVITHQGANSESGHYQAF	432	450		3.43483	3.76215	4.28947	4.38464	4.56186			IGVITHQGANSESGHYQAF	432	450		2.53113	3.17914	3.25354	3.58001	3.86045			IGVITHQGANSESGHYQAF	432	450		1.88416	2.25538	2.68321	2.9292	3.34843			IGVITHQGANSESGHYQAF	432	450		-0.9037	-0.583	-1.0359	-0.8046	-0.7014		-0.9037	-0.583	-1.0359	-0.8046	-0.7014
	VITHQGANSESGHYQAF	434	450		3.34446	3.66743	4.2492	4.36358	4.42587			VITHQGANSESGHYQAF	434	450		2.49621	3.06814	3.25058	3.52914	3.86514			VITHQGANSESGHYQAF	434	450		1.72945	2.15666	2.66544	2.95032	3.29262			VITHQGANSESGHYQAF	434	450		-0.8482	-0.5993	-0.9986	-0.8344	-0.5607		-0.8482	-0.5993	-0.9986	-0.8344	-0.5607
	DENKWYKFNDDKVSV	456	470		1.28581	2.28015	2.33781	2.62265	3.1813			DENKWYKFNDDKVSV	456	470		1.17155	2.26237	2.17975	2.44509	2.69366			DENKWYKFNDDKVSV	456	470		1.28278	2.14337	2.21713	2.52125	2.71422			DENKWYKFNDDKVSV	456	470		-0.1143	-0.0178	-0.1581	-0.1776	-0.4876		-0.1143	-0.0178	-0.1581	-0.1776	-0.4876
	YKFNDDKVSV	461	470		1.0645	1.91881	2.14252	2.43184	2.7562			YKFNDDKVSV	461	470		0.969254	1.9364	1.95653	2.15889	2.36097			YKFNDDKVSV	461	470		0.986314	1.79363	1.89501	2.12102	2.17996			YKFNDDKVSV	461	470		-0.0952	0.0176	-0.186	-0.2729	-0.3952		-0.0952	0.0176	-0.186	-0.2729	-0.3952
	VEKEKIESLAGGGESDSA	471	488		5.52623	7.16219	8.52017	9.31763	9.40305			VEKEKIESLAGGGESDSA	471	488		5.06897	6.40624	7.91219	8.78399	9.28894			VEKEKIESLAGGGESDSA	471	488		3.33385	4.39199	6.03737	7.2235	8.45277			VEKEKIESLAGGGESDSA	471	488		-0.4573	-0.756	-0.608	-0.5336	-0.1141		-0.4573	-0.756	-0.608	-0.5336	-0.1141
	VEKEKIESLAGGGESDSAL	471	489		5.38543	6.56385	8.25251	9.25487	9.3105			VEKEKIESLAGGGESDSAL	471	489		4.60681	6.53204	7.62234	8.42075	9.0908			VEKEKIESLAGGGESDSAL	471	489		3.05596	4.01247	5.18244	6.83156	7.95798			VEKEKIESLAGGGESDSAL	471	489		-0.7786	-0.0318	-0.6302	-0.8341	-0.2197		-0.7786	-0.0318	-0.6302	-0.8341	-0.2197
	ILMYKGFGL	490	498		0.900741	1.05561	1.03552	1.04647	1.32695			ILMYKGFGL	490	498		1.01299	1.06144	1.09493	1.17343	1.39558			ILMYKGFGL	490	498		1.01293	1.08193	1.04832	1.15444	1.5524			ILMYKGFGL	490	498		0.1123	0.0058	0.0594	0.127	0.0686		0.1123	0.0058	0.0594	0.127	0.0686
	MYKGFGL	492	498		0.715587	0.777252	0.695351	0.785169	0.931438			MYKGFGL	492	498		0.703173	0.83075	0.790829	0.819038	0.94653			MYKGFGL	492	498		0.682054	0.757719	0.688579	0.862706	1.01768			MYKGFGL	492	498		-0.0124	0.0535	0.0955	0.0339	0.0151		-0.0124	0.0535	0.0955	0.0339	0.0151
					Ubp6 replicate 2											Ubp6-UbVMe replicate 2											Ubp6-UbVMe+base replicate 2											D(Ubp6-UbVMe) - D(Ubp6) Replicate 2						D(Ubp6-UbVMe) - D(Ubp6) Replicate 2
	Sequence	Start	End		10 sec	1 min	10 min	1 hour	4 hours			Sequence	Start	End		10 sec	1 min	10 min	1 hour	4 hours			Sequence	Start	End		10 sec	1 min	10 min	1 hour	4 hours			Sequence	Start	End		10 sec	1 min	10 min	1 hour	4 hours		10 sec	1 min	10 min	1 hour	4 hours
	FNIRHSGKVYPIT	8	20		0.918444	1.84307	3.73376	4.7186	4.86899			FNIRHSGKVYPIT	8	20		0.890833	1.72539	2.99124	4.38577	4.70905			FNIRHSGKVYPIT	8	20		0.880657	1.41256	1.82535	2.0481	2.38497			FNIRHSGKVYPIT	8	20		-0.0276	-0.1177	-0.7425	-0.3328	-0.1599		-0.0276	-0.1177	-0.7425	-0.3328	-0.1599
	FNIRHSGKVYPITL	8	21		0.956752	1.90428	4.02378	5.25896	5.46944			FNIRHSGKVYPITL	8	21		0.879552	1.68767	3.20007	4.83034	5.09399			FNIRHSGKVYPITL	8	21		0.74699	1.276	1.64264	1.93829	2.18622			FNIRHSGKVYPITL	8	21		-0.0772	-0.2166	-0.8237	-0.4286	-0.3754		-0.0772	-0.2166	-0.8237	-0.4286	-0.3754
	NIRHSGKVYPITL	9	21		0.995746	1.85054	3.58846	4.66774	4.81057			NIRHSGKVYPITL	9	21		0.863199	1.6165	2.95617	4.28647	4.60408			NIRHSGKVYPITL	9	21		0.756937	1.31882	1.60648	1.90284	2.18036			NIRHSGKVYPITL	9	21		-0.1325	-0.234	-0.6323	-0.3813	-0.2065		-0.1325	-0.234	-0.6323	-0.3813	-0.2065
	LSTDATSADLKSKAEE	21	36		1.93539	3.06553	n/a	n/a	n/a			LSTDATSADLKSKAEE	21	36		1.96709	2.79248	5.85608	8.01287	8.22293			LSTDATSADLKSKAEE	21	36		1.86055	2.40818	3.79488	4.59037	5.43772			LSTDATSADLKSKAEE	21	36		n/a	n/a	n/a	n/a	n/a
	STDATSADL	22	30		1.6589	2.36199	3.73369	4.00829	4.16644			STDATSADL	22	30		1.6422	2.21094	3.26758	3.94258	4.16897			STDATSADL	22	30		1.4592	1.83763	2.2649	2.58609	3.11438			STDATSADL	22	30		n/a	n/a	n/a	n/a	n/a
	STDATSADLKSKAEE	22	36		1.87666	2.79132	6.85394	7.79862	7.82481			STDATSADLKSKAEE	22	36		1.79457	2.77653	5.33519	7.54445	7.77356			STDATSADLKSKAEE	22	36		1.5889	2.16779	3.49013	4.26296	5.07122			STDATSADLKSKAEE	22	36		-0.0821	-0.0148	-1.5188	-0.2542	-0.0512		-0.0821	-0.0148	-1.5188	-0.2542	-0.0512
	STDATSADLKSKAEEL	22	37		1.80841	2.95692	6.87063	8.40669	8.64948			STDATSADLKSKAEEL	22	37		1.75076	2.69023	5.84184	8.31699	8.65433			STDATSADLKSKAEEL	22	37		1.67541	2.20547	3.75386	4.91366	5.90015			STDATSADLKSKAEEL	22	37		-0.0577	-0.2667	-1.0288	-0.0897	0.0049		-0.0577	-0.2667	-1.0288	-0.0897	0.0049
	SIKIYPLIKPGST	58	70		2.53598	4.02101	5.32154	6.34895	6.5195			SIKIYPLIKPGST	58	70		2.49841	3.75089	4.91023	6.05855	6.36697			SIKIYPLIKPGST	58	70		1.99708	3.23095	3.80123	4.49993	5.44365			SIKIYPLIKPGST	58	70		-0.0376	-0.2701	-0.4113	-0.2904	-0.1525		-0.0376	-0.2701	-0.4113	-0.2904	-0.1525
	SIKIYPLIKPGSTVML	58	73		n/a	n/a	n/a	n/a	n/a			SIKIYPLIKPGSTVML	58	73		n/a	n/a	n/a	n/a	n/a			SIKIYPLIKPGSTVML	58	73		1.98145	3.16777	4.20413	5.06168	5.97442			SIKIYPLIKPGSTVML	58	73		n/a	n/a	n/a	n/a	n/a
	IKIYPLIKPGST	59	70		2.00062	3.18566	4.56658	5.47142	5.73992			IKIYPLIKPGST	59	70		1.86293	2.96258	3.93793	5.12964	5.54336			IKIYPLIKPGST	59	70		1.54544	2.49231	3.13164	3.77376	4.58124			IKIYPLIKPGST	59	70		-0.1377	-0.2231	-0.6287	-0.3418	-0.1966		-0.1377	-0.2231	-0.6287	-0.3418	-0.1966
	VMLLGTPDANL	71	81		3.20341	3.19529	3.98413	4.42558	4.62041			IKIYPLIKPGSTVML	59	73		1.90318	3.40559	4.69015	6.67601	7.03677			IKIYPLIKPGSTVML	59	73		1.34532	2.40218	3.29521	4.07411	4.95922			IKIYPLIKPGSTVML	59	73		n/a	n/a	n/a	n/a	n/a
	LGTPDANL	74	81		3.2306	3.13977	3.34564	3.35174	3.39063			VMLLGTPDANL	71	81		3.00535	3.10616	3.38026	4.10233	4.41512			VMLLGTPDANL	71	81		1.34629	2.23324	2.85883	3.0424	3.06488			VMLLGTPDANL	71	81		-0.1981	-0.0891	-0.6039	-0.3233	-0.2053		-0.1981	-0.0891	-0.6039	-0.3233	-0.2053
	ISKPAKKNNFIEDLAPEQQVQQ	82	103		9.93935	9.88363	10.5481	10.2387	10.4999			LGTPDANL	74	81		2.97164	2.983	2.89104	2.89931	3.11399			LGTPDANL	74	81		1.56864	2.49079	2.90569	2.94139	2.99574			LGTPDANL	74	81		-0.259	-0.1568	-0.4546	-0.4524	-0.2766		-0.259	-0.1568	-0.4546	-0.4524	-0.2766
	IEDLAPEQQVQQ	92	103		5.3801	5.26991	5.50903	5.37774	5.55333			ISKPAKKNNFIEDLAPEQQVQQ	82	103		9.68603	9.68142	9.67677	9.81291	9.97372			ISKPAKKNNFIEDLAPEQQVQQ	82	103		8.76283	9.73914	9.85728	9.83098	9.85087			ISKPAKKNNFIEDLAPEQQVQQ	82	103		-0.2533	-0.2022	-0.8714	-0.4258	-0.5262		-0.2533	-0.2022	-0.8714	-0.4258	-0.5262
	IEDLAPEQQVQQF	92	104		6.17241	6.11052	6.36927	6.20242	6.31219			IEDLAPEQQVQQ	92	103		5.05353	5.04411	5.02679	5.08654	5.24138			IEDLAPEQQVQQ	92	103		4.70326	5.25546	5.35745	5.29556	5.37431			IEDLAPEQQVQQ	92	103		-0.3266	-0.2258	-0.4822	-0.2912	-0.312		-0.3266	-0.2258	-0.4822	-0.2912	-0.312
	IEDLAPEQQVQQFAQL	92	107		8.83645	8.61704	9.11855	9.03809	8.96611			IEDLAPEQQVQQF	92	104		5.94618	5.94512	5.80422	6.02235	6.16835			IEDLAPEQQVQQF	92	104		5.51632	5.96169	6.05137	6.0842	6.09923			IEDLAPEQQVQQF	92	104		-0.2262	-0.1654	-0.565	-0.1801	-0.1438		-0.2262	-0.1654	-0.565	-0.1801	-0.1438
	FAQLPVGFKNMGNT	104	117		3.59684	4.55882	5.92209	7.12478	7.58386			IEDLAPEQQVQQFAQL	92	107		8.56299	8.57236	8.5392	8.69038	8.93135			IEDLAPEQQVQQFAQL	92	107		8.26656	8.73075	8.78458	8.75831	8.86147			IEDLAPEQQVQQFAQL	92	107		-0.2735	-0.0447	-0.5793	-0.3477	-0.0348		-0.2735	-0.0447	-0.5793	-0.3477	-0.0348
	PVGFKNMGNTCYL	108	120		1.97729	2.97072	4.56925	6.04571	6.52654			FAQLPVGFKNMGNT	104	117		4.08664	4.86516	5.58857	6.66429	7.29156			FAQLPVGFKNMGNT	104	117		n/a	n/a	n/a	n/a	n/a			FAQLPVGFKNMGNT	104	117		0.4898	0.3063	-0.3335	-0.4605	-0.2923		0.4898	0.3063	-0.3335	-0.4605	-0.2923
	QALYRVNDLRD	125	135		1.28873	1.28167	n/a	n/a	2.42077			QALYRVNDLRD	125	135		1.22771	1.3058	1.399	2.13688	2.50089			QALYRVNDLRD	125	135		0.961329	1.24468	1.66474	2.14944	2.25755			QALYRVNDLRD	125	135		n/a	n/a	n/a	n/a	n/a
	MKRCFENLQNKSFKSVL	163	179		4.26973	4.85539	5.75045	6.2281	6.55171			MKRCFENLQNKSFKSVL	163	179		3.84017	4.59209	4.90586	5.27948	5.90738			MKRCFENLQNKSFKSVL	163	179		3.83868	4.58965	5.43877	5.67526	5.93182			MKRCFENLQNKSFKSVL	163	179		-0.4296	-0.2633	-0.8446	-0.9486	-0.6443		-0.4296	-0.2633	-0.8446	-0.9486	-0.6443
	KRCFENLQNKSFKSVL	164	179		3.87157	4.61175	5.23527	5.4957	5.90541			KRCFENLQNKSFKSVL	164	179		3.56186	4.21367	4.43508	4.80061	5.3837			KRCFENLQNKSFKSVL	164	179		3.42208	4.23621	4.80385	5.00558	5.24211			KRCFENLQNKSFKSVL	164	179		-0.3097	-0.3981	-0.8002	-0.6951	-0.5217		-0.3097	-0.3981	-0.8002	-0.6951	-0.5217
	LNTLRKCYPQF	184	194		1.07442	1.35437	1.60446	2.3174	3.45501			LNTLRKCYPQF	184	194		0.753234	0.810245	0.809497	1.09075	1.57801			LNTLRKCYPQF	184	194		0.730875	0.819141	0.859737	1.15242	1.58995			LNTLRKCYPQF	184	194		-0.3212	-0.5441	-0.795	-1.2267	-1.877		-0.3212	-0.5441	-0.795	-1.2267	-1.877
	NTLRKCYPQF	185	194		1.10684	1.48235	1.70501	2.2771	3.25514			NTLRKCYPQF	185	194		0.884507	0.955293	0.946843	1.17148	1.62708			NTLRKCYPQF	185	194		0.855601	0.922931	0.957711	1.19216	1.55504			NTLRKCYPQF	185	194		-0.2223	-0.5271	-0.7582	-1.1056	-1.6281		-0.2223	-0.5271	-0.7582	-1.1056	-1.6281
	AERDSQGGF	195	203		3.14411	2.92665	3.17038	3.15015	3.28302			AERDSQGGF	195	203		2.96392	2.9232	2.82727	2.77068	3.04816			AERDSQGGF	195	203		2.74843	2.95311	2.9546	2.88448	2.99859			AERDSQGGF	195	203		-0.1802	-0.0035	-0.3431	-0.3795	-0.2349		-0.1802	-0.0035	-0.3431	-0.3795	-0.2349
	AERDSQGGFYKQQDAEEL	195	212		4.34106	5.7293	6.85195	7.39051	7.94328			AERDSQGGFYKQQDAEEL	195	212		3.97575	4.07031	4.16027	4.40321	4.88865			AERDSQGGFYKQQDAEEL	195	212		3.97425	4.14114	4.26819	4.6266	4.69388			AERDSQGGFYKQQDAEEL	195	212		-0.3653	-1.659	-2.6917	-2.9873	-3.0546		-0.3653	-1.659	-2.6917	-2.9873	-3.0546
	YKQQDAEELF	204	213		1.19811	1.78657	2.57964	3.7445	4.41552			YKQQDAEELF	204	213		0.983054	0.998099	0.980233	0.963739	1.05445			YKQQDAEELF	204	213		n/a	n/a	n/a	n/a	n/a			YKQQDAEELF	204	213		-0.2151	-0.7885	-1.5994	-2.7808	-3.3611		-0.2151	-0.7885	-1.5994	-2.7808	-3.3611
	FTQLFHSM	213	220		0.517185	0.341262	n/a	n/a	0.454937			FTQLFHSM	213	220		0.398029	0.340658	0.311883	0.384459	0.454946			FTQLFHSM	213	220		n/a	0.254414	0.241141	0.300081	0.424414			FTQLFHSM	213	220		n/a	n/a	n/a	n/a	n/a
	FTQLFHSMS	213	221		0.475445	0.41979	0.527185	0.365692	0.650977			FTQLFHSMS	213	221		0.38448	0.372967	0.33541	0.411888	0.455119			FTQLFHSMS	213	221		n/a	0.44864	0.282438	0.145922	0.383611			FTQLFHSMS	213	221		-0.091	-0.0468	-0.1918	0.0462	-0.1959		-0.091	-0.0468	-0.1918	0.0462	-0.1959
	FHSMSIVF	217	224		n/a	n/a	n/a	n/a	n/a			FHSMSIVF	217	224		0.223783	0.23102	0.134506	0.212789	0.16268			FHSMSIVF	217	224		0.109683	0.189073	0.147281	0.221468	0.186624			FHSMSIVF	217	224		n/a	n/a	n/a	n/a	n/a
	FHSMSIVFGDKFSED	217	231		0.83638	0.901226	0.917408	n/a	n/a			FHSMSIVFGDKFSED	217	231		0.950294	1.39578	1.5207	1.95578	2.80906			FHSMSIVFGDKFSED	217	231		1.19871	1.71669	2.38196	2.96137	3.44017			FHSMSIVFGDKFSED	217	231		0.1139	0.4946	0.6033	n/a	n/a		0.1139	0.4946	0.6033
	SIVFGDKFSEDF	221	232		1.36269	1.63375	2.69067	3.11192	3.49111			SIVFGDKFSEDF	221	232		1.12941	1.61916	2.19951	2.60967	3.33702			SIVFGDKFSEDF	221	232		1.24477	1.70795	2.65338	3.13653	3.53693			SIVFGDKFSEDF	221	232		-0.2333	-0.0146	-0.4912	-0.5023	-0.1541		-0.2333	-0.0146	-0.4912	-0.5023	-0.1541
	IVFGDKFSED	222	231		1.38912	2.0227	2.70711	3.00045	3.40833			IVFGDKFSED	222	231		0.996524	1.34373	2.00834	2.47689	3.07344			IVFGDKFSED	222	231		1.06452	1.48236	2.55733	3.07373	3.31429			IVFGDKFSED	222	231		-0.3926	-0.679	-0.6988	-0.5236	-0.3349		-0.3926	-0.679	-0.6988	-0.5236	-0.3349
	IVFGDKFSEDF	222	232		1.45934	2.04558	3.04372	3.42281	3.61629			IVFGDKFSEDF	222	232		1.1204	1.48225	2.15799	2.59653	3.2197			IVFGDKFSEDF	222	232		1.1799	1.5522	2.64213	3.20533	3.58033			IVFGDKFSEDF	222	232		-0.3389	-0.5633	-0.8857	-0.8263	-0.3966		-0.3389	-0.5633	-0.8857	-0.8263	-0.3966
	KTTIKDTANDNDITVKENESDSKL	237	260		5.08407	7.73407	9.79886	10.8852	12.2629			KTTIKDTANDNDITVKENESDSKL	237	260		3.9007	5.58086	7.26709	8.23813	9.3541			KTTIKDTANDNDITVKENESDSKL	237	260		4.13959	5.66633	7.68963	8.3245	9.20833			KTTIKDTANDNDITVKENESDSKL	237	260		-1.1834	-2.1532	-2.5318	-2.6471	-2.9088		-1.1834	-2.1532	-2.5318	-2.6471	-2.9088
	KTTIKDTANDNDITVKENESDSKLQC	237	262		5.0497	7.81548	10.5175	10.9334	12.9098			KTTIKDTANDNDITVKENESDSKLQC	237	262		4.08249	6.00465	8.00241	8.86767	10.0864			KTTIKDTANDNDITVKENESDSKLQC	237	262		4.08247	5.97874	8.13782	8.86437	9.89213			KTTIKDTANDNDITVKENESDSKLQC	237	262		-0.9672	-1.8108	-2.515	-2.0657	-2.8234		-0.9672	-1.8108	-2.515	-2.0657	-2.8234
	ITVKENESDSKL	249	260		2.6823	3.43432	4.19785	4.30283	4.84975			ITVKENESDSKL	249	260		2.15393	2.88356	3.04931	3.38713	4.138			ITVKENESDSKL	249	260		2.10314	2.81922	3.00937	3.48955	4.10286			ITVKENESDSKL	249	260		-0.5284	-0.5508	-1.1485	-0.9157	-0.7117		-0.5284	-0.5508	-1.1485	-0.9157	-0.7117
	ITVKENESDSKLQC	249	262		3.12077	4.19469	5.1789	5.30517	5.7535			ITVKENESDSKLQC	249	262		2.5068	3.57915	3.92546	4.2811	5.09832			ITVKENESDSKLQC	249	262		2.46355	3.47114	3.95141	4.27364	4.9454			ITVKENESDSKLQC	249	262		-0.614	-0.6155	-1.2534	-1.0241	-0.6552		-0.614	-0.6155	-1.2534	-1.0241	-0.6552
	QCHISGTTNF	261	270		3.64353	3.84946	4.37415	4.1403	4.18396			QCHISGTTNF	261	270		3.25807	3.41469	3.60308	3.72177	3.94028			QCHISGTTNF	261	270		2.37758	2.80157	3.3324	3.66943	3.92306			QCHISGTTNF	261	270		-0.3855	-0.4348	-0.7711	-0.4185	-0.2437		-0.3855	-0.4348	-0.7711	-0.4185	-0.2437
	HISGTTNF	263	270		3.20911	3.10822	3.45872	3.20421	3.37855			HISGTTNF	263	270		3.06216	3.11948	3.02334	3.04672	3.20882			HISGTTNF	263	270		2.1835	2.45745	2.858	3.04376	3.11121			HISGTTNF	263	270		-0.147	0.0113	-0.4354	-0.1575	-0.1697		-0.147	0.0113	-0.4354	-0.1575	-0.1697
	MRNGLLEGL	271	279		0.748216	1.08791	1.98232	3.03222	3.43819			MRNGLLEGL	271	279		0.500488	0.756516	1.33054	2.14324	2.83222			MRNGLLEGL	271	279		0.427212	0.66457	1.24787	1.98918	2.47233			MRNGLLEGL	271	279		-0.2477	-0.3314	-0.6518	-0.889	-0.606		-0.2477	-0.3314	-0.6518	-0.889	-0.606
	MRNGLLEGLN	271	280		1.13904	1.59716	2.9588	4.01007	4.53675			MRNGLLEGLN	271	280		0.904606	1.27275	2.19108	3.16856	4.00917			MRNGLLEGLN	271	280		0.669429	0.908949	1.85547	3.01435	3.66298			MRNGLLEGLN	271	280		-0.2344	-0.3244	-0.7677	-0.8415	-0.5276		-0.2344	-0.3244	-0.7677	-0.8415	-0.5276
	NEKIEKRSDLTGANSIY	280	296		4.72226	6.06208	7.57738	8.06873	8.16453			NEKIEKRSDLTGANSIY	280	296		2.84496	4.12255	5.21711	5.89743	6.46741			NEKIEKRSDLTGANSIY	280	296		2.89681	3.95437	5.2531	5.81814	6.0186			NEKIEKRSDLTGANSIY	280	296		-1.8773	-1.9395	-2.3603	-2.1713	-1.6971		-1.8773	-1.9395	-2.3603	-2.1713	-1.6971
	NEKIEKRSDLTGANSIYS	280	297		4.88847	6.78551	8.48463	n/a	9.51709			NEKIEKRSDLTGANSIYS	280	297		2.99439	4.3529	5.48867	6.16533	6.79997			NEKIEKRSDLTGANSIYS	280	297		n/a	n/a	n/a	n/a	n/a			NEKIEKRSDLTGANSIYS	280	297		-1.8941	-2.4326	-2.996	n/a	-2.7171		-1.8941	-2.4326	-2.996		-2.7171
	NEKIEKRSDLTGANSIYSVEKKISRLPKF	280	308		3.72081	4.55256	n/a	n/a	9.30505			NEKIEKRSDLTGANSIYSVEKKISRLPKF	280	308		2.47208	3.3082	4.00417	4.91576	5.59052			NEKIEKRSDLTGANSIYSVEKKISRLPKF	280	308		2.14958	3.05713	4.01533	4.72733	5.28498			NEKIEKRSDLTGANSIYSVEKKISRLPKF	280	308		-1.2487	-1.2444	n/a	n/a	-3.7145		-1.2487	-1.2444			-3.7145
	EKIEKRSDLTGANSIY	281	296		4.44176	5.76236	7.04622	7.13436	7.64392			EKIEKRSDLTGANSIY	281	296		2.55289	3.84856	4.90631	5.46874	5.97727			EKIEKRSDLTGANSIY	281	296		2.72649	n/a	4.81123	5.47353	5.80991			EKIEKRSDLTGANSIY	281	296		-1.8889	-1.9138	-2.1399	-1.6656	-1.6666		-1.8889	-1.9138	-2.1399	-1.6656	-1.6666
	KIEKRSDLTGANSIY	282	296		4.08671	5.1268	6.24785	n/a	n/a			KIEKRSDLTGANSIY	282	296		2.50432	3.61213	4.64926	5.44903	5.73904			KIEKRSDLTGANSIY	282	296		2.535	3.53208	4.7151	5.25812	5.49541			KIEKRSDLTGANSIY	282	296		-1.5824	-1.5147	-1.5986	n/a	n/a		-1.5824	-1.5147	-1.5986
	KIEKRSDLTGANSIYS	282	297		n/a	n/a	n/a	n/a	n/a			KIEKRSDLTGANSIYS	282	297		2.63899	3.8546	4.92632	5.65275	6.20327			KIEKRSDLTGANSIYS	282	297		2.4031	n/a	n/a	n/a	5.94582			KIEKRSDLTGANSIYS	282	297		n/a	n/a	n/a	n/a	n/a
	SVEKKISRLPKF	297	308		0.486649	0.373286	0.422532	n/a	0.710606			SVEKKISRLPKF	297	308		0.313005	0.359451	0.372473	0.520364	0.643984			SVEKKISRLPKF	297	308		0.322997	0.351628	0.347494	0.549374	0.700632			SVEKKISRLPKF	297	308		-0.1736	-0.0138	-0.0501	n/a	-0.0666		-0.1736	-0.0138	-0.0501		-0.0666
	VEKKISRLPKF	298	308		0.330842	0.207009	0.147956	0.336099	0.256368			VEKKISRLPKF	298	308		0.327323	0.268708	0.250314	0.367174	0.351095			VEKKISRLPKF	298	308		0.286739	0.283115	0.286501	0.398153	0.399475			VEKKISRLPKF	298	308		-0.0035	0.0617	0.1024	0.0311	0.0947		-0.0035	0.0617	0.1024	0.0311	0.0947
	LTVQYVRF	309	316		0.682749	1.39982	1.91407	2.28268	2.43986			LTVQYVRF	309	316		0.229806	0.367981	0.715161	1.30373	1.37257			LTVQYVRF	309	316		n/a	n/a	n/a	n/a	n/a			LTVQYVRF	309	316		-0.4529	-1.0318	-1.1989	-0.979	-1.0673		-0.4529	-1.0318	-1.1989	-0.979	-1.0673
	DVADMLT	339	345		n/a	n/a	n/a	n/a	n/a			DVADMLT	339	345		0.739935	0.801714	0.867047	1.35351	1.70266			DVADMLT	339	345		0.750498	0.734257	0.931632	1.28822	1.63635			DVADMLT	339	345		n/a	n/a	n/a	n/a	n/a
	DVADMLTPEYAAE	339	351		1.85049	2.42983	3.06821	3.68733	4.51899			DVADMLTPEYAAE	339	351		1.70692	2.30288	2.93383	3.64717	4.05782			DVADMLTPEYAAE	339	351		1.61134	2.18192	2.97892	3.67262	3.99368			DVADMLTPEYAAE	339	351		-0.1436	-0.1269	-0.1344	-0.0402	-0.4612		-0.1436	-0.1269	-0.1344	-0.0402	-0.4612
	DVADMLTPEYAAEKVKVRDEL	339	359		2.32538	2.92747	4.38725	6.20051	7.67258			DVADMLTPEYAAEKVKVRDEL	339	359		2.0752	2.95342	4.08564	6.06738	7.66299			DVADMLTPEYAAEKVKVRDEL	339	359		2.06094	2.82897	4.45865	6.15066	7.56281			DVADMLTPEYAAEKVKVRDEL	339	359		-0.2502	0.0259	-0.3016	-0.1331	-0.0096		-0.2502	0.0259	-0.3016	-0.1331	-0.0096
	MLTPEYAAEKVKVRDEL	343	359		1.63093	2.27635	3.47779	n/a	5.9675			MLTPEYAAEKVKVRDEL	343	359		1.45738	2.23502	3.26437	4.42969	5.87157			MLTPEYAAEKVKVRDEL	343	359		1.41878	2.30483	3.8489	4.91512	n/a			MLTPEYAAEKVKVRDEL	343	359		-0.1735	-0.0413	-0.2134	n/a	-0.0959		-0.1735	-0.0413	-0.2134		-0.0959
	LTPEYAAEKVKVRDEL	344	359		1.24689	1.81601	3.13152	4.8705	6.02275			LTPEYAAEKVKVRDEL	344	359		1.33936	2.01153	3.06697	4.30273	5.67374			LTPEYAAEKVKVRDEL	344	359		1.27634	2.03933	3.32945	4.74571	5.66306			LTPEYAAEKVKVRDEL	344	359		0.0925	0.1955	-0.0646	-0.5678	-0.349		0.0925	0.1955	-0.0646	-0.5678	-0.349
	NVMTPREQYETQ	385	396		6.12161	6.08997	6.42494	6.22117	6.3391			NVMTPREQYETQ	385	396		5.85866	5.83852	5.79271	5.87333	6.07557			NVMTPREQYETQ	385	396		5.82545	5.94648	5.95268	5.92823	5.98875			NVMTPREQYETQ	385	396		-0.2629	-0.2515	-0.6322	-0.3478	-0.2635		-0.2629	-0.2515	-0.6322	-0.3478	-0.2635
	VMTPREQYETQ	386	396		5.8686	5.92709	5.38848	5.78154	5.89122			VMTPREQYETQ	386	396		5.74952	5.76322	5.66698	5.73213	5.84645			VMTPREQYETQ	386	396		5.90064	5.83423	5.89236	5.92201	5.91662			VMTPREQYETQ	386	396		-0.1191	-0.1639	0.2785	-0.0494	-0.0448		-0.1191	-0.1639	0.2785	-0.0494	-0.0448
	QVALNES	396	402		0.391311	0.41263	0.388867	0.400142	0.335892			QVALNES	396	402		0.310534	0.315361	0.339433	0.312276	0.290068			QVALNES	396	402		0.323366	0.347481	0.265981	0.34939	0.356305			QVALNES	396	402		-0.0808	-0.0973	-0.0494	-0.0879	-0.0458		-0.0808	-0.0973	-0.0494	-0.0879	-0.0458
	VALNESEKDQWLEE	397	410		5.70486	6.42529	6.76507	6.66885	6.76119			VALNESEKDQWLEE	397	410		5.26172	6.04026	6.14309	6.17926	6.37776			VALNESEKDQWLEE	397	410		5.6543	6.3986	6.45444	6.4291	6.39833			VALNESEKDQWLEE	397	410		-0.4431	-0.385	-0.622	-0.4896	-0.3834		-0.4431	-0.385	-0.622	-0.4896	-0.3834
	VALNESEKDQWLEEYKKHFPPNL	397	419		6.98301	10.1032	n/a	n/a	12.064			VALNESEKDQWLEEYKKHFPPNL	397	419		6.64551	8.62672	10.5067	11.4676	11.7835			VALNESEKDQWLEEYKKHFPPNL	397	419		n/a	n/a	n/a	11.289	11.5744			VALNESEKDQWLEEYKKHFPPNL	397	419		-0.3375	-1.4765	n/a	n/a	-0.2805		-0.3375	-1.4765			-0.2805
	NESEKDQW	400	407		3.17183	3.06466	3.28392	3.02901	3.06171			NESEKDQW	400	407		3.01705	3.03194	2.97467	2.98506	3.13526			NESEKDQW	400	407		3.04925	3.18816	3.21945	3.18874	3.25276			NESEKDQW	400	407		-0.1548	-0.0327	-0.3093	-0.044	0.0736		-0.1548	-0.0327	-0.3093	-0.044	0.0736
	NESEKDQWLEE	400	410		3.54854	4.13046	4.52777	4.44275	4.57339			NESEKDQWLEE	400	410		3.27938	3.94805	4.02229	4.03222	4.3058			NESEKDQWLEE	400	410		3.73713	4.22605	4.32428	4.21425	4.26804			NESEKDQWLEE	400	410		-0.2692	-0.1824	-0.5055	-0.4105	-0.2676		-0.2692	-0.1824	-0.5055	-0.4105	-0.2676
	YKKHFPPNLEKGENPSC	411	427		2.65834	3.26086	3.85511	3.88344	4.39852			YKKHFPPNLEKGENPSC	411	427		2.50548	2.89649	3.49136	3.87798	4.41859			YKKHFPPNLEKGENPSC	411	427		n/a	n/a	n/a	n/a	n/a			YKKHFPPNLEKGENPSC	411	427		-0.1529	-0.3644	-0.3638	-0.0055	0.0201		-0.1529	-0.3644	-0.3638	-0.0055	0.0201
	YKKHFPPNLEKGENPSCV	411	428		2.73608	3.2605	3.52827	n/a	4.97152			YKKHFPPNLEKGENPSCV	411	428		2.47006	3.03529	3.53375	4.0816	4.42819			YKKHFPPNLEKGENPSCV	411	428		n/a	n/a	n/a	n/a	n/a			YKKHFPPNLEKGENPSCV	411	428		-0.266	-0.2252	0.0055	n/a	-0.5433		-0.266	-0.2252	0.0055		-0.5433
	YKKHFPPNLEKGENPSCVYNL	411	431		2.76092	3.09291	3.54109	4.69352	5.02712			YKKHFPPNLEKGENPSCVYNL	411	431		2.56146	3.05002	3.54132	4.16023	4.49313			YKKHFPPNLEKGENPSCVYNL	411	431		2.58941	3.01085	3.65863	4.22902	4.12647			YKKHFPPNLEKGENPSCVYNL	411	431		-0.1995	-0.0429	0.0002	-0.5333	-0.534		-0.1995	-0.0429	0.0002	-0.5333	-0.534
	YKKHFPPNLEKGENPSCVYNLIG	411	433		2.8229	3.23271	3.94046	3.93078	4.77598			YKKHFPPNLEKGENPSCVYNLIG	411	433		2.65463	3.09976	3.49249	4.18661	4.45883			YKKHFPPNLEKGENPSCVYNLIG	411	433		2.69449	3.09695	3.67526	4.11449	4.12223			YKKHFPPNLEKGENPSCVYNLIG	411	433		-0.1683	-0.1329	-0.448	0.2558	-0.3171		-0.1683	-0.1329	-0.448	0.2558	-0.3171
	EKGENPSCVYNL	420	431		0.94598	0.907239	0.923265	1.18909	1.3737			EKGENPSCVYNL	420	431		0.906407	0.906458	0.91275	1.26108	1.43945			EKGENPSCVYNL	420	431		0.778091	0.771005	0.860129	1.2253	1.28089			EKGENPSCVYNL	420	431		-0.0396	-0.0008	-0.0105	0.072	0.0658		-0.0396	-0.0008	-0.0105	0.072	0.0658
	EKGENPSCVYNLIG	420	433		0.924936	0.954448	0.898822	1.16271	1.39667			EKGENPSCVYNLIG	420	433		0.845711	0.849375	0.859844	1.1551	1.37403			EKGENPSCVYNLIG	420	433		n/a	n/a	n/a	n/a	n/a			EKGENPSCVYNLIG	420	433		-0.0792	-0.1051	-0.039	-0.0076	-0.0226		-0.0792	-0.1051	-0.039	-0.0076	-0.0226
	IGVITHQGANSESGHYQAF	432	450		3.21889	3.22658	3.72616	3.88327	4.0479			IGVITHQGANSESGHYQAF	432	450		2.24079	2.6356	2.76333	2.96497	3.35605			IGVITHQGANSESGHYQAF	432	450		1.59182	2.01286	2.32129	2.55579	2.89345			IGVITHQGANSESGHYQAF	432	450		-0.9781	-0.591	-0.9628	-0.9183	-0.6919		-0.9781	-0.591	-0.9628	-0.9183	-0.6919
	VITHQGANSESGHYQAF	434	450		3.06938	3.44017	4.00739	4.02281	4.28215			VITHQGANSESGHYQAF	434	450		2.19007	2.54712	2.77628	2.91405	3.31085			VITHQGANSESGHYQAF	434	450		1.46909	1.87912	2.24827	2.485	2.78885			VITHQGANSESGHYQAF	434	450		-0.8793	-0.8931	-1.2311	-1.1088	-0.9713		-0.8793	-0.8931	-1.2311	-1.1088	-0.9713
	IRDELDENKW	451	460		0.865429	1.31654	1.45087	1.62647	1.77262			IRDELDENKW	451	460		0.698388	1.26738	1.30971	1.38479	1.62084			IRDELDENKW	451	460		0.78403	1.31246	1.44511	1.49037	1.67054			IRDELDENKW	451	460		-0.167	-0.0492	-0.1412	-0.2417	-0.1518		-0.167	-0.0492	-0.1412	-0.2417	-0.1518
	DENKWYKFNDDKVSV	456	470		1.51817	2.21866	2.39584	2.55695	2.9697			DENKWYKFNDDKVSV	456	470		1.19927	2.05907	2.06335	2.22652	2.58036			DENKWYKFNDDKVSV	456	470		1.06141	1.99391	2.11157	2.2656	2.50757			DENKWYKFNDDKVSV	456	470		-0.3189	-0.1596	-0.3325	-0.3304	-0.3893		-0.3189	-0.1596	-0.3325	-0.3304	-0.3893
	YKFNDDKVSV	461	470		1.20119	1.89754	2.02362	2.19537	2.37439			YKFNDDKVSV	461	470		0.958976	1.69988	1.74987	1.92359	2.05633			YKFNDDKVSV	461	470		0.826271	1.69347	1.82142	1.94051	2.04826			YKFNDDKVSV	461	470		-0.2422	-0.1977	-0.2738	-0.2718	-0.3181		-0.2422	-0.1977	-0.2738	-0.2718	-0.3181
	VEKEKIESLAGGGESDSA	471	488		5.18417	6.21506	8.07446	8.64547	9.10479			VEKEKIESLAGGGESDSA	471	488		4.34398	5.79399	7.04438	8.13637	8.62505			VEKEKIESLAGGGESDSA	471	488		2.89672	4.10717	5.31098	6.62782	7.68502			VEKEKIESLAGGGESDSA	471	488		-0.8402	-0.4211	-1.0301	-0.5091	-0.4797		-0.8402	-0.4211	-1.0301	-0.5091	-0.4797
	VEKEKIESLAGGGESDSAL	471	489		4.65615	5.98012	7.82632	8.59047	8.80009			VEKEKIESLAGGGESDSAL	471	489		4.09255	5.64407	6.68809	7.57698	8.25978			VEKEKIESLAGGGESDSAL	471	489		2.66413	3.71357	4.92278	6.20404	7.28934			VEKEKIESLAGGGESDSAL	471	489		-0.5636	-0.3361	-1.1382	-1.0135	-0.5403		-0.5636	-0.3361	-1.1382	-1.0135	-0.5403
	ILMYKGFGL	490	498		0.977152	0.709268	0.775547	0.774176	1.28457			ILMYKGFGL	490	498		0.762525	0.839972	0.677959	0.895162	1.08287			ILMYKGFGL	490	498		0.581301	0.865389	0.886167	1.08093	1.35883			ILMYKGFGL	490	498		-0.2146	0.1307	-0.0976	0.121	-0.2017		-0.2146	0.1307	-0.0976	0.121	-0.2017
	MYKGFGL	492	498		0.876774	0.908784	0.802083	0.836807	0.953826			MYKGFGL	492	498		0.730211	0.815518	0.800746	0.855212	1.01205			MYKGFGL	492	498		0.764958	0.835712	0.823574	n/a	1.22317			MYKGFGL	492	498		-0.1466	-0.0933	-0.0013	0.0184	0.0582		-0.1466	-0.0933	-0.0013	0.0184	0.0582
[truncated: 13 more columns]

## Sheet: Coverage maps
	Rpt1													Legend:
															Peptides identified AND followed in exchange experiment
															Peptides identified but not followed in exchange experiment
	Rpt2
	Rpt3
	Rpt4
	Rpt5
	Rpt6
	Ubp6 Replicate 1															Ubp6 Replicate 2
